1           **Male and female bees show large differences in floral preference**

2

3           Michael Roswell [mroswell.rutgers@gmail.com](mailto:mroswell.rutgers@gmail.com)

4           Graduate program in ecology and evolution, Rutgers University

5           14 College Farm Road, New Brunswick, NJ 08904

6

7           Jonathan Dushoff

8           Department of biology, McMaster University

9           1280 Main St. West, Hamilton, Ontario ON L8S 4K1

10

11          Rachael Winfree

12          Department of ecology, evolution, and natural resources, Rutgers University

13          14 College Farm Road, New Brunswick, NJ 08904

## 14 **Abstract**

15

16 1. Intraspecific variation in foraging niche can drive food web dynamics and  
17 ecosystem processes. Field studies and theoretical analysis of plant-pollinator  
18 interaction networks typically focus on the partitioning of the floral community  
19 between pollinator species, with little attention paid to intraspecific variation  
20 among plants or foraging bees. In other systems, male and female animals  
21 exhibit different, cascading, impacts on interaction partners. Although the  
22 foraging ecology of male bees is little known, we expect foraging preferences to  
23 differ between male and female bees, which could strongly impact plant-  
24 pollinator interaction outcomes.

25 2. We designed an observational study to evaluate the strength and  
26 prevalence of sexually dimorphic foraging preferences in bees.

27 3. We observed bees visiting flowers in semi-natural meadows in New  
28 Jersey, USA. To detect differences in flower use against a shared background  
29 resource availability, we maximized the number of interactions observed within  
30 narrow spatio-temporal windows. To distinguish observed differences in bee use  
31 of flower species, which can reflect abundance patterns and sampling effects,  
32 from underlying differences in bee preferences, we analyzed our data with both a  
33 permutation-based null model and random effects models.

34 4. We found that the diets of male and female bees of the same species  
35 were often as dissimilar as the diets of bees of different species. Furthermore, we  
36 demonstrate differences in preference between male and female bees, and  
37 identify plant species that are particularly attractive to each sex. We show that  
38 intraspecific differences in preference can be robustly identified within  
39 interactions between hundreds of species, without precisely quantifying resource  
40 availability, and despite high phenological turnover.

41 5. Given the large differences in flower use and preference between male  
42 and female bees, ecological sex differences should be integrated into studies of  
43 bee demography, plant pollination, and coevolutionary relationships between  
44 flowers and insects.

45

## 46 **Key Words**

47 dimorphism, dissimilarity, Morisita-Horn, phenology, plant-pollinator interaction,  
48 pollination, pollinator habitat, preference

49

## 50 **Introduction**

51 Intraspecific variation in traits and behavior, including foraging niche, has  
52 important consequences for species interactions and conservation (Bolnick et al.,  
53 2011; Durell, 2000). Sexual dimorphism is a large source of individual niche  
54 variation, and an important factor in plant-animal interactions, such as seed  
55 dispersal (Zwolak, 2018). Sexual dimorphism underlies adaptation, speciation,  
56 and the way in which animals exploit their ecological niche (Butler, Sawyer, &  
57 Losos, 2007; Temeles, Miller, & Rifkin, 2010). Morphological, behavioral, and life-  
58 history dimorphisms can also drive the form and function of ecosystems, for  
59 example when predator sex ratio drives the community composition of lower

60 trophic levels, shown experimentally (Start & De Lisle, 2018) and in nature,  
61 where responses extended to water chemistry as well (Fryxell, Arnett, Apgar,  
62 Kinnison, & Palkovacs, 2015).

63  
64 Though ecological dimorphisms were first studied in vertebrates (Selander,  
65 1966), they are common across taxa, including insects (Shine, 1989).  
66 Surprisingly, in bees (Hymenoptera, Apoidea) for which both foraging (P.  
67 Willmer, 2011) and sexual dimorphism (Alcock et al., 1978) have been well  
68 studied, sexually dimorphic foraging has rarely been documented. Intraspecific  
69 variation in floral preference is well known in social (Heinrich, 1979) and to a  
70 lesser extent, solitary bee species (Bruninga-Socolar, Crone, & Winfree, 2016;  
71 Tur, Vigalondo, Trøjelsgaard, Olesen, & Traveset, 2014), yet most community-  
72 level studies focus on species-level interaction networks, and furthermore, on the  
73 foraging preferences of only female bees.

74  
75 Male bees differ from their better-studied female counterparts in their life history  
76 and ecology. Female bees construct, maintain, provision, and defend nests,  
77 whereas male bees primarily seek mates (P. G. Willmer & Stone, 2004). Both  
78 sexes drink floral nectar for their own caloric needs, but only females collect  
79 pollen to provision young, and thus forage at greater rates. While the pollen from  
80 each flower species (the term we use throughout for the flowers from a species  
81 of plant) tends to be morphologically and nutritionally distinct, interspecific  
82 variation in the chemical composition of nectar is comparatively subtle (Cane &  
83 Sipes, 2006). Thus, we expect the foraging ecology, including floral preferences,  
84 of male and female bees to differ as well.

85  
86 Male bees prove to be important pollinators when studied, both in specialized oil-  
87 or scent-collecting pollination systems (Eltz et al., 2007; Etl, Franschitz, Aguiar,  
88 Schönenberger, & Dötterl, 2017; Janzen, 1971) and also when males are  
89 foraging for nectar and pollen (Cane, 2002; Cane, Sampson, & Miller, 2011;  
90 Ogilvie & Thomson, 2015). Male bees may also be particularly relevant for bee  
91 conservation. Males may be limiting in declining populations, either because  
92 genetic diversity is necessary for the development of female offspring as a result  
93 of complementary sex determination, or because mate or sperm limitation results  
94 from poor male condition (Elias, Dorn, & Mazzi, 2010; Straub et al., 2016). As the  
95 dispersing sex in most bee species, males may be crucial for gene flow and  
96 metapopulation persistence even when they are not locally limiting (López-Uribe,  
97 Morreale, Santiago, & Danforth, 2015; Ulrich, Perrin, & Chapuisat, 2009).

98  
99 Foraging niche is only partly described by resource use. Indeed, resource  
100 preferences may be more important than use alone in many contexts, including  
101 conservation. Preference—the use of a resource in excess of its relative  
102 availability—is challenging to measure, because both resource use and  
103 availability must be known. Floral resource availability for pollinators is  
104 particularly hard to quantify outside an experimental context because the  
105 appropriate scale and units of floral resource availability are unclear. The

106 composition, amount, and supply rate of pollen and nectar per flower, the number  
107 of flowers per inflorescence, of inflorescences per individual, and the number and  
108 distribution of individual plants over the square kilometers of a bee's foraging  
109 range are all important components of availability (Hicks et al., 2016).  
110 Furthermore, floral availability can change rapidly over time. However,  
111 differences in flower use between bees foraging at the same place and time  
112 indicate differences in preference, which may occur between species, or between  
113 individuals of the same species.

114  
115 In this study, we assess differences between floral preferences of male and  
116 female bees in the wild. We collected bees foraging on flowers in meadows in  
117 New Jersey, USA. In order to observe preference differences, we collected as  
118 many individuals as possible during replicated, short (3-day) windows, during  
119 which we assumed floral availability and bee abundance were constant at each  
120 site. We compare the species composition of flowers visited by males and  
121 females of the most common bee species across the entire study as a naïve  
122 measure of differences in preference between the sexes. Then, using random  
123 effects models, we assess when differential flower species *use* by male and  
124 female bees likely arises from sex-specific floral *preference*, as opposed to  
125 shifting overlap between foragers and floral resources (i.e. changes in *availability*  
126 without differences in preference). Specifically, we ask

- 127  
128 1) How much do male and female bee diets overlap?  
129 2) To what degree are particular flower species disproportionately visited by  
130 bees of one sex?  
131 3) To what extent are differences in floral use driven by preference, rather  
132 than phenological differences between male and female bees?

133

## 134 **Materials and Methods**

135

### 136 **Study design and data collection**

137

138 Because absolute preference is nearly impossible to observe outside of an  
139 experiment, we designed our study to reveal differences in preference between  
140 groups of bees. In order to collect a large number of males and females from  
141 many native bee species, we selected six meadows (sites) in New Jersey, USA  
142 with a high abundance and diversity of flowers. These meadows were managed  
143 for pollinator-attractive, summer-blooming forbs through seed addition, and a  
144 combination of mowing, burning, and weed removal. Most flower species present  
145 in the meadows are native to the eastern United States. We collected our data  
146 during peak bloom and maximum day length (6 June to 20 August, 2016), and  
147 during good weather (sunny enough for observers to see their own shadow, no  
148 precipitation). We visited each site for three consecutive good weather days over  
149 five evenly spaced sampling rounds in the 11-week period of our study. In all  
150 analyses, we assume that bees and flowers detected at a site within one 3-day  
151 sampling round co-occurred. In contrast, we assume that turnover of both plant

152 species in bloom and bee species activity can occur in the ~10 days between  
153 sampling rounds.

154

155 During each 3-day sampling round, an observer walked parallel transects  
156 through the meadow (which ranged in size from 0.8–2.2 ha; mean=1.4 ha),  
157 observing every open flower within a moving 1-m semicircle, and net-collecting  
158 any bee seen actively foraging, which we defined as contacting anthers or  
159 collecting nectar from a flower (Fig. S1). We collected all bee species except  
160 *Apis mellifera* L., the domesticated western honey bee, because *Apis* males do  
161 not forage. Observations began as soon as pollinator activity picked up in the  
162 morning (7–9 am) and continued into the late afternoon or evening until pollinator  
163 activity slowed substantially. Observers sampled nearly continuously, in 30-  
164 minute timed collection bouts with short breaks in between. If inclement weather  
165 precluded a minimum of six 30-minute sampling bouts in a day, we added an  
166 additional day to the sampling round as soon as weather permitted.

167

168 Flower species were identified in the field by the data collector. Bee species were  
169 identified using a dissecting microscope and published keys; Jason Gibbs  
170 (University of Manitoba), Joel Gardner (University of Manitoba), and Sam Droege  
171 (USGS) assisted with identification for bees in the genera *Andrena*, *Anthophora*,  
172 *Coelioxys*, *Halictus*, *Heriades*, *Hoplitis*, *Hylaeus*, *Lasioglossum*, *Megachile*,  
173 *Melissodes*, *Nomada*, *Osmia*, *Pseudoanthidium*, *Ptilothrix*, *Sphecodes*, *Stelis*,  
174 and *Triepeolus*, and at least one of them confirmed voucher specimens for every  
175 species. We determined every specimen to species except for the following four  
176 complexes: Most bees in the genus *Nomada* with bidentate mandibles (*ruficornis*  
177 group) were treated as one species. All specimens from the *Hylaeus* species  
178 complex that includes *Hylaeus affinis*, *H. modestus*, and at least one additional  
179 species, informally dubbed “species A,” were treated as a single species,  
180 denoted *Hylaeus affinis-modestus*, because females cannot be reliably  
181 distinguished. There is a cryptic species in the genus *Halictus* unlikely to occur in  
182 our area, *Halictus poeyi*, which is not morphologically distinct from *H. ligatus*; we  
183 treat all specimens in this complex as *Halictus ligatus*. We could not confidently  
184 separate all specimens of the two closely related *Lasioglossum* species  
185 *Lasioglossum hitchensi* and *L. weemsi*. Thus, we treat all specimens from either  
186 species as one, denoted *Lasioglossum hitchensi-weemsi*. All bee specimens are  
187 curated in the Winfree lab collection at Rutgers University, and the data used in  
188 this paper are available from the Dryad Digital Repository  
189 <http://dx.doi.org/XXXXXXX> (Roswell et al.)

190

## 191 **Analytical methods**

192

193 We performed all statistical analyses and simulations using R 3.5.1 (R Core  
194 Team, 2018).

195

196 **1) How much do male and female bee diets overlap?**

197

198 To compare the diets of male and female bees, we used the Morisita-Horn index  
199 of resource overlap (Horn, 1966; Morisita, 1959). This dissimilarity index  
200 compares the proportion of all female bees found on each flower species to the  
201 proportion of all male bees found on each flower species. In other words, it  
202 compares the contribution of each flower species to female diets (where this term  
203 includes the food that females collect for themselves and also to feed to young)  
204 to the contribution of the same flower species to male diets. The Morisita-Horn  
205 index ranges from zero (completely similar) to one (maximally dissimilar), and  
206 has several good properties for our purposes. First, it uses proportions, placing  
207 visits from male and female bees on the same scale, even though most visits  
208 come from females. Second, it is much more sensitive to large proportions than  
209 to small ones, thereby down-weighting the contribution of flower species for  
210 which we have little information. Third, the Morisita-Horn estimates are resilient  
211 to undersampling and uneven sample size between groups (Barwell, Isaac, &  
212 Kunin, 2015).

213  
214 To determine whether the male-female differences we observed exceeded those  
215 expected by chance, we compared the observed compositional dissimilarity  
216 between flower visits from male and from female bees to dissimilarity measures  
217 from a null model that randomly permuted the bee sex associated with each  
218 flower-visit record. This permutation holds constant the total number of male and  
219 of female visits, and the total number of visits to each flower species from both  
220 sexes combined (Fig. S2). The range of dissimilarity values from this simulation  
221 is the difference we would observe in our sample, if there were no true difference  
222 in flower species use between males and females of the same bee species. We  
223 evaluated the hypothesis that male and female diets overlap less than would be  
224 expected by chance; thus we use a one-sided alpha of  $p < 0.05$ . We iterated this  
225 null simulation 9999 times, which was sufficient to stabilize p-values near our  
226 chosen alpha (North, Curtis & Sham 2002). When the observed dissimilarity was  
227 greater than 9500 of the 9999 simulated dissimilarities, we concluded that we  
228 had detected a difference in the pattern of floral visitation between conspecific  
229 male and female bees, given the observed diet breadth and abundance of each  
230 sex.

231  
232 To compare the diet overlap we observed between sexes to a meaningful  
233 benchmark, interspecific diet overlap, we repeated the same null model analysis,  
234 this time comparing females of the focal species to females of other species. We  
235 performed one analysis for each bee species for which we collected at least 20  
236 visitation records for each sex (19 species). This sample size threshold is  
237 arbitrary, but null model variance shrinks with sample size, such that apparent  
238 patterns for species with smaller sample sizes are rarely interpretable (Fig. S3).  
239 Because we analyze 19 bee species, females of each species are compared to  
240 18 others. We then compared the male-female difference (observed minus mean  
241 null dissimilarity in flower communities visited) to the analogous species-species  
242 difference (observed minus null dissimilarity).

243

244 For this analysis, which evaluates holistic differences between male and female  
245 bees of the same species, we combined observations across the full season and  
246 all sites. This allows us to observe foraging niche differences that are driven by  
247 flower and/ or bee phenology, in addition to any sex-specific floral preference.

248

249 **2) To what degree are particular flower species disproportionately visited by bees**  
250 **of one sex?**

251

252 This analysis uses our entire data set of 153 bee species to determine whether  
253 particular flower species are disproportionately visited by male or female bees,  
254 and whether the answer varies by bee species. We can infer a preference  
255 difference between male and female bees for a flower species when predicted  
256 odds of visitors to that flower species being male are especially high or low. To  
257 do this, we use a random effects model in which bee sex is the response, and  
258 flower species, bee species, site, and their interactions are random effects. We  
259 statistically control for variation in the overall sex ratio across bee species  
260 through a random intercept of bee species, and variation in sex ratios across  
261 sites, through random intercepts for site, and the site-bee species and site-flower  
262 species interactions. Because it is unlikely that, within bee species, sex ratios at  
263 birth vary greatly across space, any variability attributed to site terms would likely  
264 result from differential overlap of bee foraging activity and flower bloom across  
265 space.

266

267 We call this model the “summed model” because we sum interactions observed  
268 across the entire season (all five sampling rounds) at each site. In the summed  
269 model, the relationship between phenological overlap and the odds of flower-  
270 visiting bees being male would be incorporated into the species effects. This  
271 perspective is helpful for considering flower species’ contributions to the overall  
272 diets of male versus female bees. We fit the model with the R package lme4  
273 (Bates, Maechler, & Walker, 2016) with the following call:

274

275 ***Summed model***

```
276 lme4::glmer(bee_sex ~ (1|site)+(1|flower_species)+(1|bee_species)+  
277 (1|flower_species:bee_species)+(1|site:bee_species)+  
278 (1|site:flower_species), family="binomial", data=data)
```

279

280 We included bee species and site as random, rather than fixed, effects to directly  
281 compare the variability in bee sex associated with each of these predictors to the  
282 variability associated with flower species (preference). Comparing the overall  
283 variability across these groups was more important to us than assessing  
284 predictions on a per-site or per-bee-species basis. We fit flower species, the  
285 primary covariate of interest, as a random effect to facilitate model fitting (fewer  
286 degrees of freedom) as well as interpretation. In our summed model, we included  
287 all two-way interactions, but omitted the three-way interaction, bee species by  
288 flower species by site. Although the sort of context-dependent preference this  
289 term could represent (e.g. males from bee species 1 prefer flower A at one site

290 (relative to females), but shun it at another) may exist in nature, it is unlikely we  
291 would estimate it accurately in our model.

292

293 We confirmed model convergence by comparing several fitting methods using  
294 the allFit function in lme4 (Bates et al., 2016), which all showed similar parameter  
295 estimates (Table S1). We tested whether residuals from our model fit were  
296 overdispersed using Bolker's function "overdisp" (Bolker, 2017), and visually  
297 assessed our additivity assumptions with binned residual plots (Gelman & Hill,  
298 2007) (Fig. S4).

299

300 **3) To what extent are differences in floral use driven by preference, rather than**  
301 **phenological differences between male and female bees?**

302

303 Over the 11 weeks of our study, we observed turnover in bee species, in flower  
304 bloom, and within-bee species changes in sex ratio. Therefore, phenological  
305 overlap between male versus female bees and the bloom period of particular  
306 flower species, rather than preference of those bees for those flowers, may  
307 explain much of the variation in sex ratio we observed across visitors. In question  
308 3, we are explicitly interested in distinguishing sex-specific diet *preferences* from  
309 variable *use* resulting from seasonal resource availability and male vs. female  
310 abundance. We do this in the "seasonal model" by incorporating sampling round  
311 (our measure of phenology) as an additional random intercept effect, along with  
312 random intercepts for the interactions between sampling round and the other  
313 covariates. We chose to include sampling round as a random effect because this  
314 enables direct comparison to all other terms in both models. We ignored the  
315 three- and four-way interactions between bee species, flower species, and other  
316 covariates. We fit this model with the following call in the R package lme4, with  
317 new terms in bold:

318

319 **Seasonal model**

```
320 glmer(bee_sex ~ (1|site)+(1|flower_species)+(1|bee_species)+  
321 (1|flower_species:bee_species)+(1|site:bee_species)+  
322 (1|site:flower_species)+ (1|sampling_round)+(1|site:sampling_round)+  
323 (1|flower_species:sampling_round)+  
324 (1| bee_species:sampling_round)+  
325 (1|site:bee_species:sampling_round)+  
326 (1|site:flower_species:sampling_round), family="binomial", data=data)
```

327

328 Our index of preference for both the *summed model* and the *seasonal*  
329 *model* is the change in odds that a bee is male when the flower species it visits is  
330 given. To describe the importance of model terms, we calculated a bootstrapped  
331 median odds ratio using code from Seth (Seth, 2017), which gives the expected  
332 difference in odds that a flower-visiting bee is male between levels of a predictor  
333 (Merlo et al., 2006). For example, a median odds ratio of five for the main effect  
334 of sampling round would indicate that the odds of a flower-visiting bee being  
335 male differ by about a factor of five between sampling rounds, while a median



336 odds ratio of one would indicate that the odds of a flower-visiting bee being male  
337 do not change across rounds. If the median odds ratio is large for flower species  
338 in both models, we could say that there are intrinsic (i.e. not simply phenological)  
339 properties of flower species identity that male or female bees prefer. If flower  
340 species is a strong predictor of bee sex in the summed model but not in the  
341 seasonal one, we would still conclude that flower species often contribute more  
342 strongly to the diet of one sex than the other, though these differences may not  
343 arise due to differing preferences. If the sampling round terms have large median  
344 odds ratios, then accounting for phenology is critical for identifying differences in  
345 preference in addition to differences in use.

346

## 347 **Results**

348

349 In total we collected 18,698 bee specimens belonging to 152 bee species (table  
350 S2) from a total of 109 flower species (table S3), which together comprised 1417  
351 unique species-species interactions. Roughly 18% of specimens were male  
352 (n=3372). Thus, the overall ratio of male to female bees we collected was 0.22,  
353 although this ratio varied markedly between flower species (Fig. 1).

354

355 *How much do male and female bee diets overlap?*

356

357 We found that male and female bee diets overlap significantly less than would be  
358 expected at random (Fig. 2), and that the differences in diet composition between  
359 male and female bees of several species were of similar magnitude to the  
360 differences in diet between species of bee (Fig. 3).

361

362 *To what degree are particular flower species disproportionately visited by bees of*  
363 *one sex?*

364

365 The sex ratio of flower-visiting bees varied across species of flower (Fig. 2). After  
366 controlling for bee species identity (the strongest predictor of sex in our models,  
367 Fig. 4), and site, we still found that some flower species received a  
368 disproportionate number of male bee visitors (Figs 4–5). The median odds ratio  
369 for the main effect of flower species was 3.6 (bootstrapped CI 3.0–4.2) in our  
370 summed model, indicating that, typically, the visitor sex ratio differs between two  
371 flower species by more than a factor of 3. Furthermore, we observed sex-based  
372 differences in flower use specific to particular bee species: the median odds ratio  
373 for the flower species by bee species interaction in our summed model was  
374 nearly as large (median=3.1, bootstrapped CI 3.0–3.3) as the main effect of  
375 flower species. By contrast, sex ratios are not expected to differ between sites  
376 (median odds ratio for main effect of site=1).

377

378 *To what extent are differences in floral use driven by preference, rather than*  
379 *phenological differences between male and female bees?*

380

381 The flower species blooming in our system turned over throughout our 11-week

382 sampling period, with several highly visited species blooming for only one of the  
383 three months during which we sampled. This turnover, along with potential sex-  
384 specific bee flight seasons, means that differences in diet between male and  
385 female bees could reflect seasonal availability and use, without also indicating  
386 preference differences between the sexes. Indeed, phenology predicts bee sex  
387 somewhat, with the odds of a flower-visiting bee being male expected to change  
388 by a factor of 1.5 (bootstrapped CI 1.1–1.9) between sampling rounds (Fig. 4).  
389 Phenological patterns of male vs. female flight seasons vary across bee species;  
390 the median odds ratio for the bee species by sampling round interaction is 2.2  
391 (bootstrapped CI 2.1–2.3) (Fig. 4). Even after accounting for these effects,  
392 however, there remains a strong association between the species of flower a bee  
393 visits and its sex (Figs 4–5). The relative effects of each flower species on the  
394 sex of its visitors were changed very little by accounting for phenology; Pearson  
395 and Spearman correlations between the random effect of flower species in the  
396 seasonal model and the same random effect in the simpler summed model were  
397 both 0.98. In addition to finding overall preference difference between male and  
398 females, we found evidence for bee-species-specific difference in floral  
399 preferences between the sexes (median odds ratios in both models for the bee  
400 species by flower species interaction > 2.8).

401

## 402 **Discussion**

403

404 We found strong differences between the flower species preferences of male and  
405 female bees. The difference in floral visits between male and female bees of the  
406 same species was similar in magnitude to differences between females of  
407 different species. The partitioning of the floral community among bee species is a  
408 primary focus of pollination ecology and ecological network analysis (Bascompte  
409 & Jordano, 2014), but male bees are typically disregarded or lumped together  
410 with their female counterparts. Our study suggests this may represent an  
411 important oversight. Further, our study provides strong confirmation of the few  
412 studies that investigate the foraging behavior of male bees, which found that  
413 males play a unique role in plant pollination (Cane, 2002; Cane et al., 2011;  
414 Ogilvie & Thomson, 2015; Pascarella, 2010). Our result also implies that male  
415 bees contribute substantially to the complexity of plant-pollinator networks in  
416 nature, and that network analyses might benefit from separating males and  
417 females into different nodes (Bolnick et al., 2011; Zwolak, 2018).

418

419 Phenology, a previously reported mechanism for distinct use of floral resources  
420 by male and female bees (Ogilvie & Thomson, 2015; Robertson, 1925),  
421 explained some variation in the sex ratio of flower-visiting bees, but was less  
422 important than flower species identity over the period of our study. We expected  
423 to find an effect of phenology because both the identity of the flower species  
424 blooming within sites, and also the sex ratio of foragers within bee species, vary  
425 across the season. Males emerge first in most solitary bees; for social species,  
426 initial broods usually consist primarily of female workers, then males and  
427 reproductive females emerge at the end of the colony cycle (P. G. Willmer &

428 Stone, 2004). Surprisingly, however, phenology only weakly predicted the sex of  
429 flower-visiting bees. This is despite the fact that, as predicted by natural history,  
430 the sampling round(s) in which males were relatively more prevalent depended  
431 on bee species (the bee species by sampling round interaction was much bigger  
432 than the sampling round main effect; Fig. 4). This indicates that our evidence for  
433 floral preference differences between male and female bees was robust to  
434 accounting for seasonal turnover in flower species bloom, bee species flight  
435 seasons, and the sex ratios within bee species.

436  
437 Whereas female bees collect both nectar and pollen, male bees forage primarily  
438 for nectar to fuel flight. Thus, we predicted that male bees would avoid flowers  
439 that produce no nectar. Indeed, in both our models, the predicted odds of a bee  
440 visiting a nectar-less flower species being male were approximately half that of a  
441 bee visiting a flower species that produces nectar (Fig. S5). A second biological  
442 difference between male and female bees is that adult male bee activities orient  
443 around mate seeking (Alcock et al., 1978). These behaviors, such as patrolling  
444 routes (Barrows, 1976) or seeking flowers visited by conspecific females (Rossi,  
445 Nonacs, & Pitts-Singer, 2010) could generate differences from females via  
446 complementarity (males visiting flower species not visited by females), or  
447 nestedness (one sex primarily visiting a subset of species visited by the other).  
448 We found evidence for both (Fig. S6). Divergent floral preferences between  
449 sexes may reflect nutritional needs or mating behavior, or simply biases resulting  
450 from previous flower encounters, or visual or olfactory sensitivities that differ  
451 between the sexes (Robert, Frasnelli, Collett, & de Ibarra, 2016; Somanathan,  
452 Borges, Warrant, & Kelber, 2017; Streinzer, Kelber, Pfabigan, Kleineidam, &  
453 Spaethe, 2013).

454  
455 While natural and semi-natural habitats are critical landscape elements for many  
456 bee species (Senapathi, Goddard, Kunin, & Baldock, 2016), what constitute  
457 suitable and/ or limiting resources within these habitats remains less clear (De  
458 Palma et al., 2015). Flowers, which provide food for adult and larval bees, are  
459 likely among them (Roulston & Goodell, 2011). Whether floral diversity *per se*  
460 tends to benefit individual pollinator taxa remains unclear (Spiesman, Bennett,  
461 Isaacs, & Gratton, 2017; Sutter, Jeanneret, Bartual, Bocci, & Albrecht, 2017).  
462 However, complementary flower species use between the sexes implies a  
463 mechanism by which a bee species could benefit from a diversity of flower  
464 choices. In addition, it is currently unknown how the distinct foraging niches of  
465 male bees mediate either the robustness of pollinator communities to species  
466 loss and environmental perturbations (Brosi & Briggs, 2013; Ramos-Jiliberto,  
467 Valdovinos, Moisset de Espanés, & Flores, 2012; Tur et al., 2014), or the  
468 effectiveness of different habitat ameliorations (Rundlöf, Persson, Smith, &  
469 Bommarco, 2014; Rusterholtz & Erhardt, 2000; Williams & Lonsdorf, 2018). This  
470 study suggests that both questions warrant further investigation.

471  
472 Patterns in bee-flower interaction data can arise from the sampling process itself  
473 (Blüthgen, 2010; Fründ, McCann, & Williams, 2016). Our analyses control for

474 these patterns. To evaluate diet overlap, we used a dissimilarity index that  
475 downweights rare diet items, and implemented a null model that accounts for  
476 differences that could arise from sampling and abundance effects. To evaluate  
477 preference, we used random effects models that incorporated all (nearly 19,000)  
478 observations, and shrank extreme values for rarely observed species-species  
479 interactions towards the global mean for each effect. Thus, our estimates for sex-  
480 specific preferences should be robust to the inevitable under-sampling of rarer  
481 taxa. Establishing differences in preference between categories of bees such as  
482 males and females, even when resource availability is seasonal and difficult to  
483 quantify, is possible using methods such as these, though absolute preference  
484 remains elusive.

485  
486 Pollination ecology and pollinator conservation still face the question of how  
487 important sexually dimorphic foraging is. Does it enhance or reduce the stability  
488 of bee populations? Should pollinator restorations explicitly include “male bee”  
489 flowers and “female bee” flowers? Are floral traits under selection to favor female  
490 versus male visitors? While our study does not answer these questions, by  
491 showing that the diets and preferences of male bees commonly differ from those  
492 of their female conspecifics, we suggest they are worthy of future study.

493

#### 494 **Author contributions**

495

496 MR and RW conceived the ideas and designed field methodology; MR, JD, and  
497 RW designed statistical methodology. MR collected the data; MR, RW, and JD  
498 analyzed the data; MR and RW led manuscript drafting. All authors contributed  
499 critically to the drafts and gave final approval for publication.

500

#### 501 **Acknowledgements**

502

503 We thank Daniel Cariveau and Neal Williams for study design suggestions, and  
504 Jason Gibbs, Tina Harrison, and Dylan Simpson for comments on an earlier  
505 draft. A USDA Conservation Innovation Grant to the Xerces Society for  
506 Invertebrate Biology (lead PI) and RW (senior investigator) funded data  
507 collection. MR was supported by an NSF Graduate Research Fellowship.  
508 Cameron Kanterman and Riva Letchinger helped collect field data; Kurtis  
509 Himmler, Tiffany Bennet, and professional taxonomists Jason Gibbs, Joel  
510 Gardiner, and Sam Droege helped with bee species determinations. Mercer  
511 County, the Institute for Advanced Study, Somerset County, and the Raritan  
512 Headwaters Association provided site permission.

513

## 514 **References**

515

- 516 Alcock, J., Barrows, E. M., Gordh, G., Hubbard, L. J., Kirkendall, L., Pyle, D. W.,  
517 ... Zalom, F. G. (1978). The ecology and evolution of male reproductive  
518 behaviour in the bees and wasps. *Zoological Journal of the Linnean Society*,  
519 64(4), 293–326. doi:10.1111/j.1096-3642.1978.tb01075.x
- 520 Barrows, E. M. (1976). Mating behavior in halictine bees (Hymenoptera:  
521 Halictidae): II. microterritorial and patrolling behavior in males of  
522 *Lasioglossum rohweri*. *Zeitschrift Fur Tierpsychologie-Journal of*  
523 *Comparative Ethology*, 40(4), 377–389.
- 524 Barwell, L. J., Isaac, N. J. B., & Kunin, W. E. (2015). Measuring beta-diversity  
525 with species abundance data. *Journal of Animal Ecology*, 1112–1122.  
526 doi:10.1111/1365-2656.12362
- 527 Bascompte, J., & Jordano, P. (2014). Mutualistic networks in time and space. In  
528 J. Bascompte & P. Jordano (Eds.), *Mutualistic networks* (pp. 87–106).  
529 Princeton University Press. Retrieved from  
530 <http://www.jstor.org/stable/j.ctt5hhnpq.8>
- 531 Bates, D., Maechler, M., & Walker, S. (2016). Package “lme4.” *CRAN*  
532 *Repository*. doi:10.18637/jss.v067.i01
- 533 Blüthgen, N. (2010). Why network analysis is often disconnected from community  
534 ecology: A critique and an ecologist’s guide. *Basic and Applied Ecology*,  
535 11(3), 185–195. doi:10.1016/j.baae.2010.01.001
- 536 Bolker, B. M. (2017). GLMM FAQ. Retrieved from  
537 <http://bbolker.github.io/mixedmodels-misc/glmmFAQ.html>
- 538 Bolnick, D. I., Amarasekare, P., Araújo, M. S., Bürger, R., Levine, J. M., Novak,  
539 M., ... Vasseur, D. A. (2011). Why intraspecific trait variation matters in  
540 community ecology. *Trends in Ecology and Evolution*, 26(4), 183–192.  
541 doi:10.1016/j.tree.2011.01.009
- 542 Brosi, B. J., & Briggs, H. M. (2013). Single pollinator species losses reduce floral  
543 fidelity and plant reproductive function. *Proceedings of the National*  
544 *Academy of Sciences*, 110(32), 13044–8. doi:10.1073/pnas.1307438110
- 545 Bruninga-Socolar, B., Crone, E. E., & Winfree, R. (2016). The role of floral  
546 density in determining bee foraging behavior: a natural experiment. *Natural*  
547 *Areas Journal*, 36(4), 392–399. doi:10.3375/043.036.0406
- 548 Butler, M. A., Sawyer, S. A., & Losos, J. B. (2007). Sexual dimorphism and  
549 adaptive radiation in Anolis lizards. *Nature*, 447(7141), 202–5.  
550 doi:10.1038/nature05774
- 551 Cane, J. H. (2002). Pollinating bees (Hymenoptera: Apiformes) of U.S. alfalfa  
552 compared for rates of pod and seed set. *Journal of Economic Entomology*,  
553 95(1), 22–27. doi:10.1603/0022-0493-95.1.22
- 554 Cane, J. H., Sampson, B. J., & Miller, S. A. (2011). Pollination value of male  
555 bees: The specialist bee *Peponapis pruinosa* (Apidae) at Summer Squash  
556 (*Cucurbita pepo*). *Environmental Entomology*, 40(3), 614–620.  
557 doi:10.1603/EN10084
- 558 Cane, J. H., & Sipes, S. S. (2006). Characterizing floral specialization by bees:  
559 Analytical methods and a revised lexicon for oligolecty. In *Plant–pollinator*

- 560 *interactions: From specialization to generalization*. doi:10.1007/BF00937854  
561 De Palma, A., Kuhlmann, M., Roberts, S. P. M., Potts, S. G., Börger, L., Hudson,  
562 L. N., ... Purvis, A. (2015). Ecological traits affect the sensitivity of bees to  
563 land-use pressures in European agricultural landscapes. *Journal of Applied*  
564 *Ecology*, 52(6), 1567–1577. doi:10.1111/1365-2664.12524  
565 Durell, S. E. A. L. V. dit. (2000). Individual feeding specialization in shorebirds:  
566 population consequences and conservation implications. *Biological Reviews*  
567 *of the Cambridge Philosophical Society*, 75(2000), 503–518.  
568 Elias, J., Dorn, S., & Mazzi, D. (2010). No evidence for increased extinction  
569 proneness with decreasing effective population size in a parasitoid with  
570 complementary sex determination and fertile diploid males. *BMC*  
571 *Evolutionary Biology*, 10(1), 366. doi:10.1186/1471-2148-10-366  
572 Eltz, T., Zimmermann, Y., Haftmann, J., Twele, R., Francke, W., Quezada-Euan,  
573 J. J. G., & Lunau, K. (2007). Enflourage, lipid recycling and the origin of  
574 perfume collection in orchid bees. *Proceedings. Biological Sciences / The*  
575 *Royal Society*, 274(1627), 2843–8. doi:10.1098/rspb.2007.0727  
576 Etl, F., Franschitz, A., Aguiar, A. J. C., Schönenberger, J., & Dötterl, S. (2017). A  
577 perfume-collecting male oil bee? Evidences of a novel pollination system  
578 involving *Anthurium acutifolium* (Araceae) and *Paratetrapedia chocoensis*  
579 (Apidae, Tapinotaspidini). *Flora: Morphology, Distribution, Functional*  
580 *Ecology of Plants*, 232, 7–15. doi:10.1016/j.flora.2017.02.020  
581 Fründ, J., McCann, K. S., & Williams, N. M. (2016). Sampling bias is a challenge  
582 for quantifying specialization and network structure: Lessons from a  
583 quantitative niche model. *Oikos*, 125(4), 502–513. doi:10.1111/oik.02256  
584 Fryxell, D. C., Arnett, H. A., Apgar, T. M., Kinnison, M. T., & Palkovacs, E. P.  
585 (2015). Sex ratio variation shapes the ecological effects of a globally  
586 introduced freshwater fish. *Proceedings of the Royal Society B*, 282(1817),  
587 20151970. doi:10.1098/rspb.2015.1970  
588 Gelman, A., & Hill, J. (2007). *Data analysis using regression and multilevel/*  
589 *hierarchical models*. New York: Cambridge University Press.  
590 Heinrich, B. (1979). “Majoring” and “Minoring” by foraging bumblebees, *Bombus*  
591 *vagans*: an experimental analysis. *Ecology*, 60(2), 245–255.  
592 Hicks, D. M., Ouvrard, P., Baldock, K. C. R., Baude, M., Goddard, M. A., Kunin,  
593 W. E., ... Stone, G. N. (2016). Food for pollinators: Quantifying the nectar  
594 and pollen resources of urban flower meadows. *PLoS ONE*, 11(6).  
595 doi:10.1371/journal.pone.0158117  
596 Horn, H. S. (1966). Measurement of “Overlap” in comparative ecological studies.  
597 *The American Naturalist*, 100(914), 419–424. Retrieved from  
598 <http://www.jstor.org/stable/2459242>  
599 Janzen, D. H. (1971). Euglossine bees as long-distance pollinators of tropical  
600 plants. *Science*, 171(3967), 203–205. doi:10.1126/science.171.3967.203  
601 López-Urbe, M. M., Morreale, S. J., Santiago, C. K., & Danforth, B. N. (2015).  
602 Nest suitability, fine-scale population structure and male-mediated dispersal  
603 of a solitary ground nesting bee in an urban landscape. *PLoS ONE*, 10(5),  
604 1–20. doi:10.1371/journal.pone.0125719  
605 Merlo, J., Chaix, B., Ohlsson, H., Beckman, A., Johnell, K., Hjerpe, P., ... Larsen,

- 606 K. (2006). A brief conceptual tutorial of multilevel analysis in social  
607 epidemiology: Using measures of clustering in multilevel logistic regression  
608 to investigate contextual phenomena. *Journal of Epidemiology and*  
609 *Community Health*, 60(4), 290–297. doi:10.1136/jech.2004.029454
- 610 Morisita, M. (1959). Measuring of interspecific association and similarity between  
611 communities. *Memoirs of the Faculty of Science, Kyushu University, Series*  
612 *E (Biology)*. Retrieved from [http://reference.morisita.gr.jp/paper\\_pdf/56.pdf](http://reference.morisita.gr.jp/paper_pdf/56.pdf)
- 613 Ogilvie, J. E., & Thomson, J. D. (2015). Male bumble bees are important  
614 pollinators of a late-blooming plant. *Arthropod-Plant Interactions*, 9(2), 205–  
615 213. doi:10.1007/s11829-015-9368-x
- 616 Pascarella, J. B. (2010). Pollination biology of *Gelsemium sempervirens* L. (Ait.)  
617 (Gelsemiaceae): do male and female *Habropoda laboriosa* F.  
618 (Hymenoptera, Apidae) differ in pollination efficiency? *Journal of Apicultural*  
619 *Research*, 49(2), 170–176. doi:10.3896/IBRA.1.49.2.05
- 620 R Core Team. (2018). R: A Language and Environment for Statistical Computing.  
621 Vienna, Austria. Retrieved from <https://www.r-project.org/>
- 622 Ramos-Jiliberto, R., Valdovinos, F. S., Moisset de Espanés, P., & Flores, J. D.  
623 (2012). Topological plasticity increases robustness of mutualistic networks.  
624 *Journal of Animal Ecology*, 81(4), 896–904. doi:10.1111/j.1365-  
625 2656.2012.01960.x
- 626 Robert, T., Frasnelli, E., Collett, T. S., & de Ibarra, N. H. (2016). Male  
627 bumblebees perform learning flights on leaving a flower but not when leaving  
628 their nest. *The Journal of Experimental Biology*, 220, 930–937.  
629 doi:10.1242/jeb.151126
- 630 Robertson, C. (1925). Heterotropic Bees. *Ecology*, 6(4), 412–436. Retrieved from  
631 <http://www.jstor.org/stable/1941781>
- 632 Rossi, B. H., Nonacs, P., & Pitts-Singer, T. L. (2010). Sexual harassment by  
633 males reduces female fecundity in the alfalfa leafcutting bee, *Megachile*  
634 *rotundata*. *Animal Behaviour*, 79(1), 165–171.  
635 doi:10.1016/j.anbehav.2009.10.023
- 636 Roulston, T. H., & Goodell, K. (2011). The role of resources and risks in  
637 regulating wild bee populations. *Annual Review of Entomology*, 56, 293–  
638 312. doi:10.1146/annurev-ento-120709-144802
- 639 Rundlöf, M., Persson, A. S., Smith, H. G., & Bommarco, R. (2014). Late-season  
640 mass-flowering red clover increases bumble bee queen and male densities.  
641 *Biological Conservation*, 172, 138–145. doi:10.1016/j.biocon.2014.02.027
- 642 Rusterholtz, H.-P., & Erhardt, A. (2000). Can nectar properties explain sex-  
643 specific flower preferences in the Adonis Blue butterfly *Lysandra bellargus*?  
644 *Ecological Entomology*, 25, 81–90.
- 645 Selander, R. K. (1966). Sexual Dimorphism and Differential Niche Utilization in  
646 Birds. *The Condor*, 68(2), 113–151. doi:10.2307/1365712
- 647 Senapathi, D., Goddard, M. A., Kunin, W. E., & Baldock, K. C. R. (2016).  
648 Landscape impacts on pollinator communities in temperate systems:  
649 evidence and knowledge gaps. *Functional Ecology*. doi:10.1111/1365-  
650 2435.12809
- 651 Seth, M. (2017). How to implement credible 95% interval for median odds ratio

- 652 using JAGS? Retrieved May 9, 2018, from  
653 <https://stats.stackexchange.com/q/318912>
- 654 Shine, R. (1989). Ecological Causes for the Evolution of Sexual Dimorphism: A  
655 Review of the Evidence. *The Quarterly Review of Biology*, 64(4), 419–461.
- 656 Somanathan, H., Borges, R. M., Warrant, E. J., & Kelber, A. (2017). Visual  
657 adaptations for mate detection in the male carpenter bee *Xylocopa*  
658 *tenuiscapa*. *PLoS ONE*, 12(1). doi:10.1371/journal.pone.0168452
- 659 Spiesman, B. J., Bennett, A., Isaacs, R., & Gratton, C. (2017). Bumble bee  
660 colony growth and reproduction depend on local flower dominance and  
661 natural habitat area in the surrounding landscape. *Biological Conservation*,  
662 206, 217–223. doi:10.1016/j.biocon.2016.12.008
- 663 Start, D., & De Lisle, S. (2018). Sexual dimorphism in a top predator  
664 (*Notophthalmus viridescens*) drives aquatic prey community assembly.  
665 *Proceedings of the Royal Society B*, 285. doi:10.1098/rspb.2018.1717
- 666 Straub, L., Villamar-Bouza, L., Bruckner, S., Chantawannakul, P., Gauthier, L.,  
667 Khongphinitbunjong, K., ... Williams, G. R. (2016). Neonicotinoid  
668 insecticides can serve as inadvertent insect contraceptives. *Proceedings of*  
669 *the Royal Society - B*, 283(20160506). doi:10.1098/rspb.2016.0506
- 670 Streinzer, M., Kelber, C., Pfabigan, S., Kleineidam, C. J., & Spaethe, J. (2013).  
671 Sexual dimorphism in the olfactory system of a solitary and a eusocial bee  
672 species. *Journal of Comparative Neurology*, 521(12), 2742–2755.  
673 doi:10.1002/cne.23312
- 674 Sutter, L., Jeanneret, P., Bartual, A. M., Bocci, G., & Albrecht, M. (2017).  
675 Enhancing plant diversity in agricultural landscapes promotes both rare bees  
676 and dominant crop-pollinating bees through complementary increase in key  
677 floral resources. *Journal of Applied Ecology*, 54(6), 1856–1864.  
678 doi:10.1111/1365-2664.12907
- 679 Temeles, E. J., Miller, J. S., & Rifkin, J. L. (2010). Evolution of sexual dimorphism  
680 in bill size and shape of hermit hummingbirds (Phaethornithinae): a role for  
681 ecological causation. *Philosophical Transactions of the Royal Society B*,  
682 365(1543), 1053–1063. doi:10.1098/rstb.2009.0284
- 683 Tur, C., Vigalondo, B., Trøjelsgaard, K., Olesen, J. M., & Traveset, A. (2014).  
684 Downscaling pollen-transport networks to the level of individuals. *Journal of*  
685 *Animal Ecology*, 83(1), 306–317. doi:10.1111/1365-2656.12130
- 686 Ulrich, Y., Perrin, N., & Chapuisat, M. (2009). Flexible social organization and  
687 high incidence of drifting in the sweat bee, *Halictus scabiosae*. *Molecular*  
688 *Ecology*, 18(8), 1791–1800. doi:10.1111/j.1365-294X.2009.04154.x
- 689 Williams, N. M., & Lonsdorf, E. V. (2018). Selecting cost-effective plant mixes to  
690 support pollinators. *Biological Conservation*, 217, 195–202.  
691 doi:10.1016/j.biocon.2017.10.032
- 692 Willmer, P. (2011). *Pollination and floral ecology*. Princeton: Princeton University  
693 Press.
- 694 Willmer, P. G., & Stone, G. N. (2004). Behavioral, ecological, and physiological  
695 determinants of the activity patterns of bees. *Advances in the Study of*  
696 *Behavior*, 34, 347–466.
- 697 Zwolak, R. (2018). How intraspecific variation in seed-dispersing animals matters



698 for plants. *Biological Reviews*, 93, 897–913. doi:10.1111/brv.12377  
699

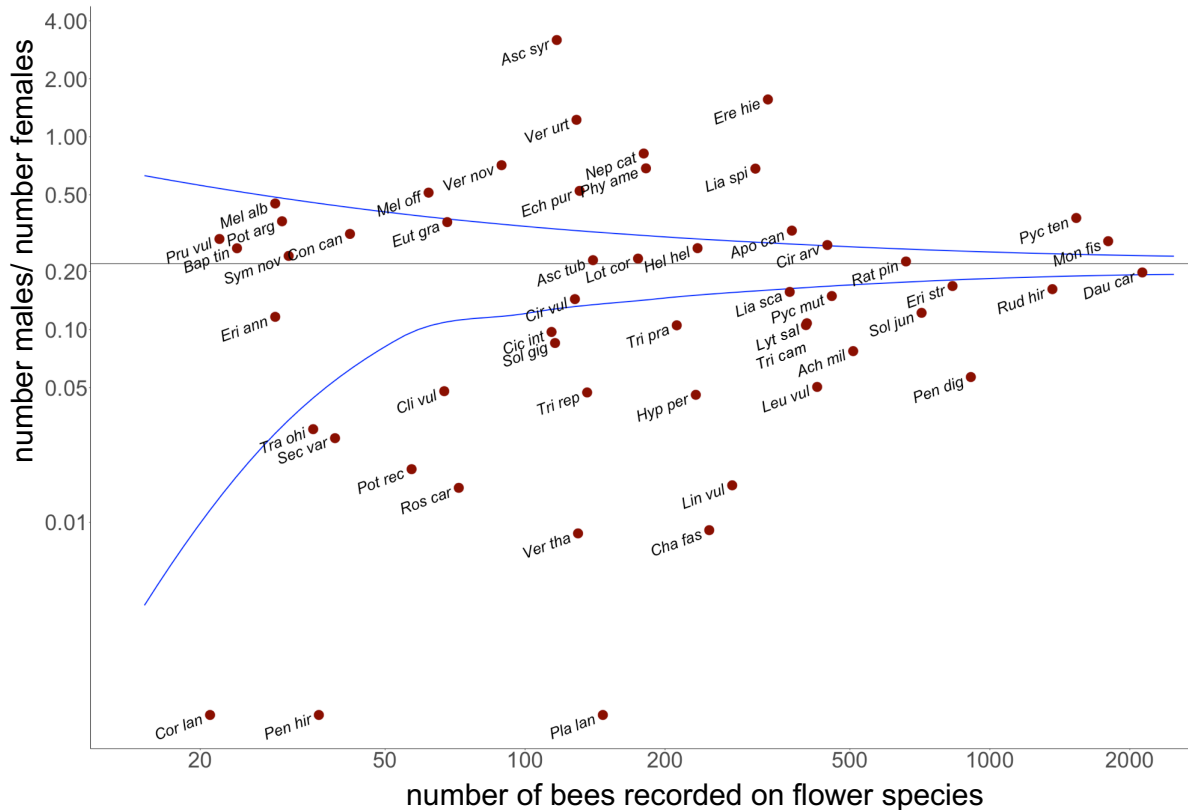

701 **Figure 1.** The sex ratio (M:F) of flower-visiting bees varies across flower species.  
 702 Each red point represents a flower species, the first three letters of the Latin  
 703 genus and species names for the flower species label each point. The x-axis is  
 704 the number of bees collected from that species, the y-axis is the ratio of male to  
 705 female bees collected from the flower. Flower species that received >19 visits are  
 706 plotted (n=54). Blue lines are smooth fits to the 97.5<sup>th</sup> and 2.5<sup>th</sup> percentiles of the  
 707 binomial distribution given by the observed ratio of males to females in our  
 708 overall dataset (M/F=0.22; i.e.  $M/(M+F)=0.18$ ). This distribution represents our  
 709 expectation for random variation in sex ratio across flower species, if the sex  
 710 ratio of flower-visiting bees is independent of flower species identity (male and  
 711 female bees exhibit the same floral preferences), and remains nearly constant  
 712 across time and space.  
 713

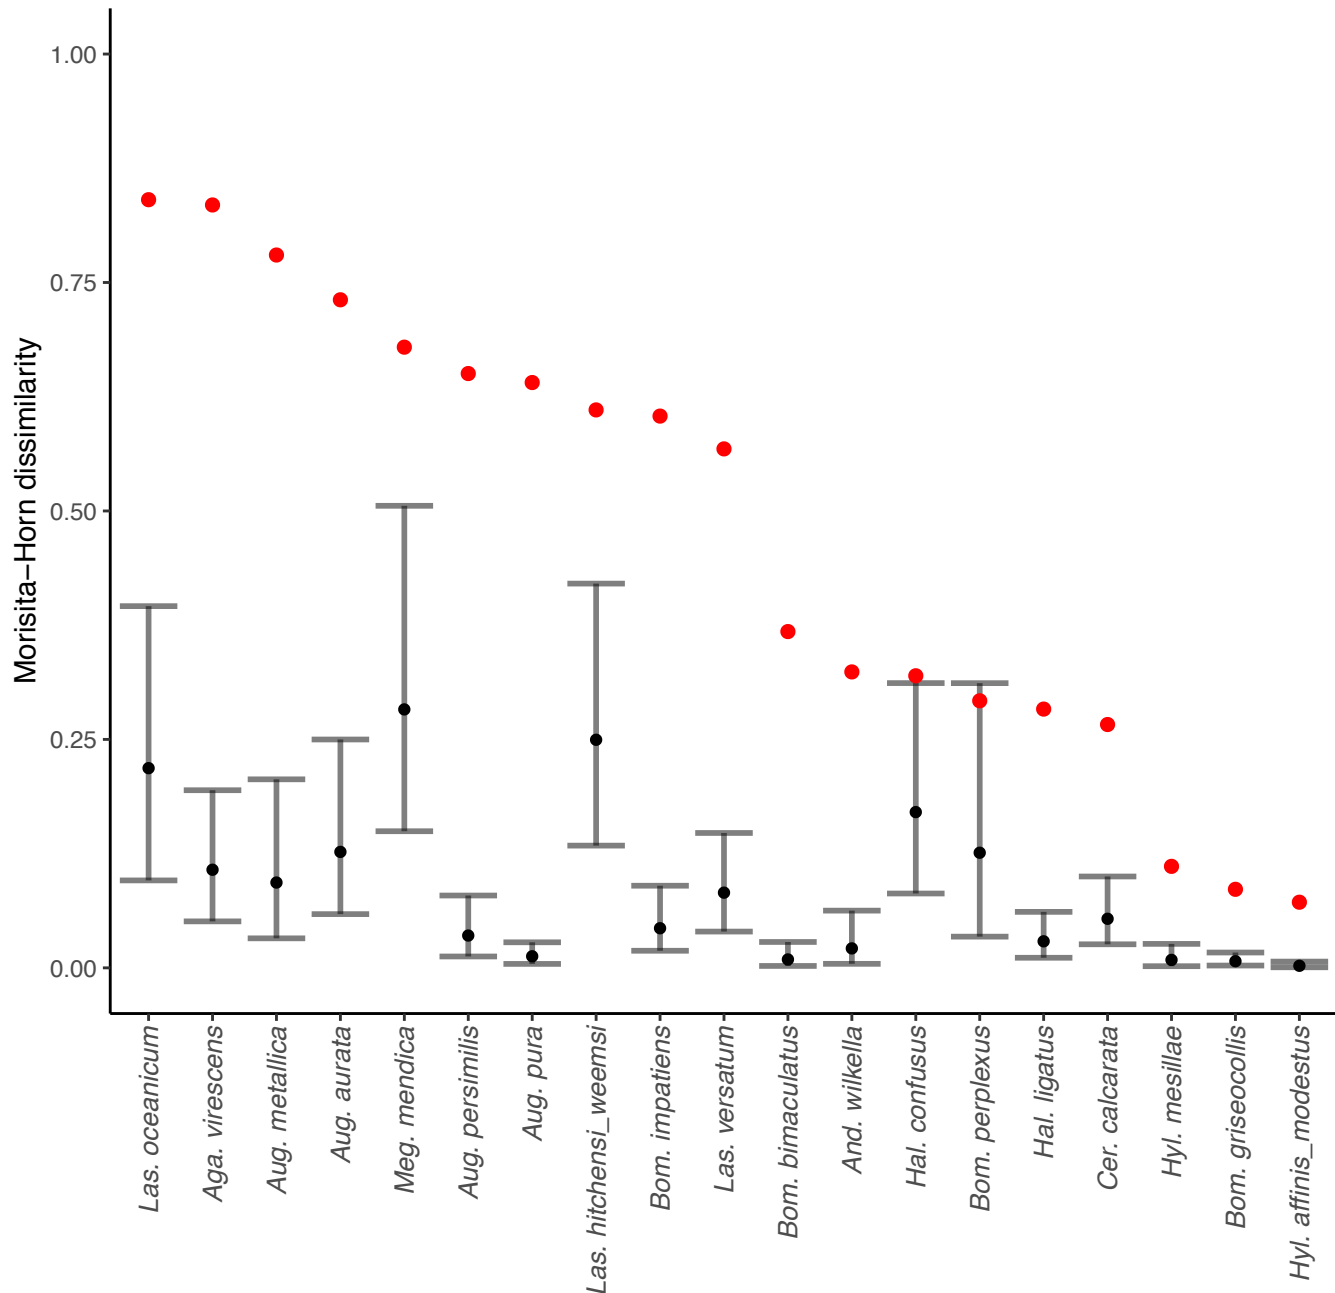

715 **Figure 2:** Flower visit patterns of male and female bees of the same species  
 716 differed significantly. Red points are observed Morisita-Horn dissimilarities  
 717 between flower communities visited by all male and all female bees of a  
 718 particular species across all sites and sampling rounds. Black points are the  
 719 mean dissimilarity (gray bars, 95% CI) from a permutation-based null model that  
 720 randomly shuffles the sex associated with each visit record, maintaining the total  
 721 number of males, females, and overall combined visits to each floral species.  
 722

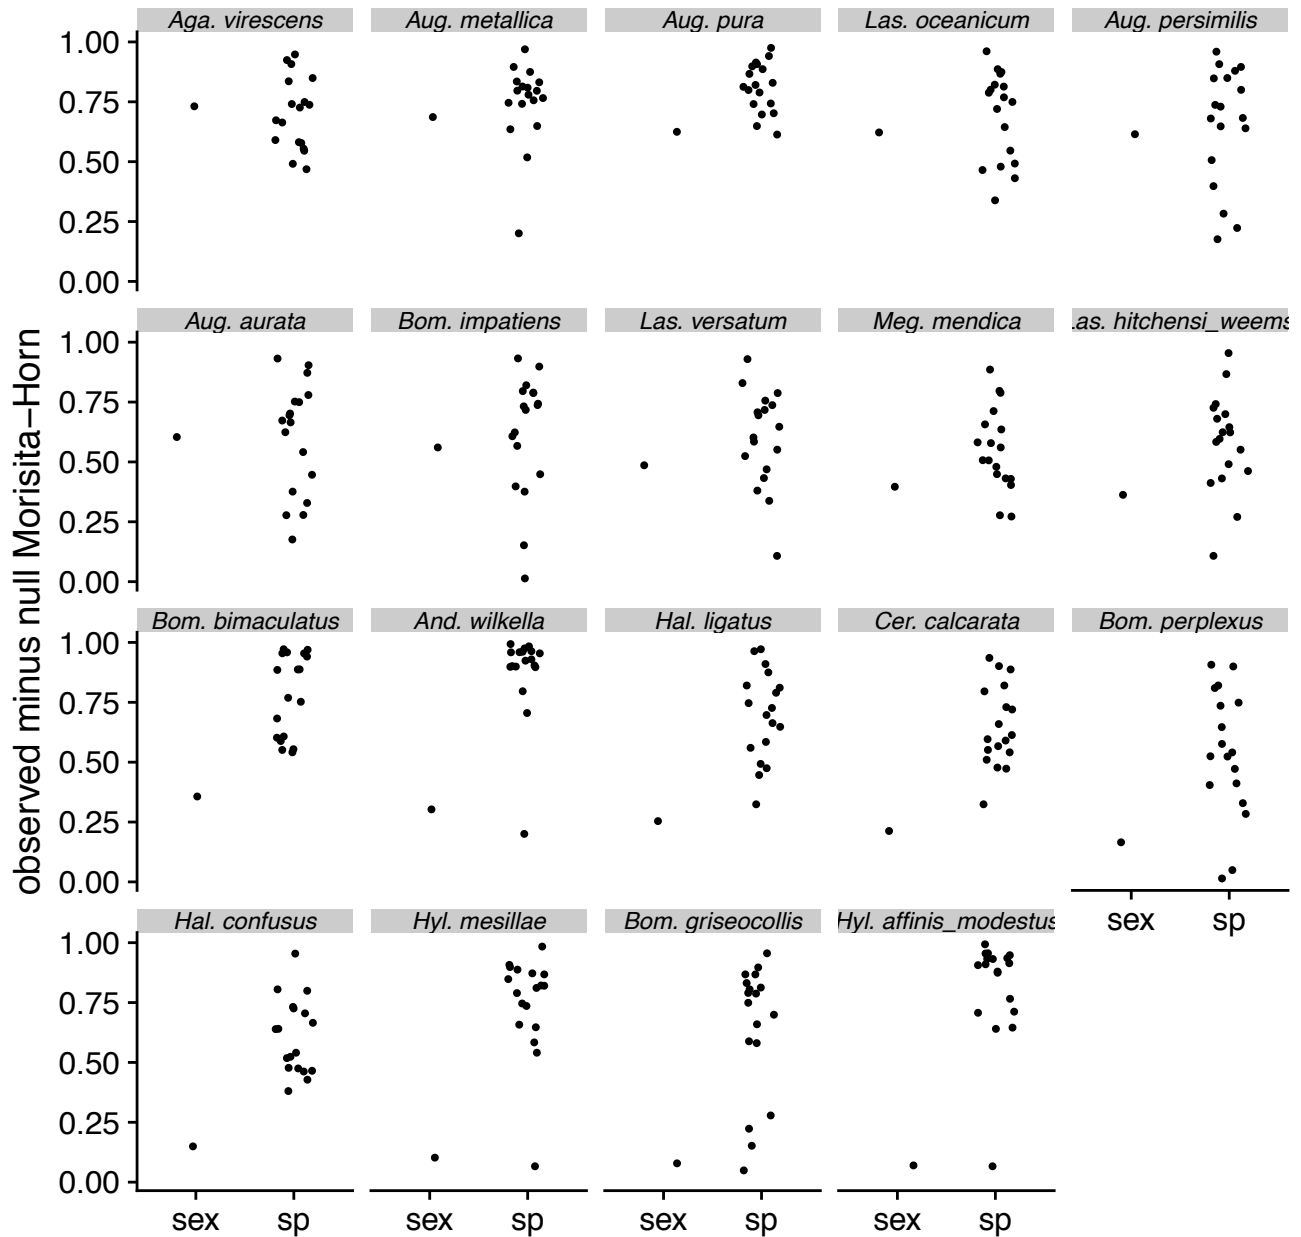

723

724

725

726

727

728

729

730

731

732

733

**Figure 3.** The diets of male and female bees of the same species can be as dissimilar as the diets of females of two different bee species. Dissimilarities in this figure are the observed statistic minus, for each pairwise comparison, the mean dissimilarity in the null model. Each panel focuses on a bee species (panel name) and shows: above the label “sex”, observed diet dissimilarity between male and female bees of the focal species, minus the average null dissimilarity resulting from randomly permuting the sex identity of each visit record; above the label “sp”, observed diet dissimilarity between female bees of the focal species and each other bee species, minus the average null dissimilarity resulting from randomly permuting the species identity of each visit record.

734

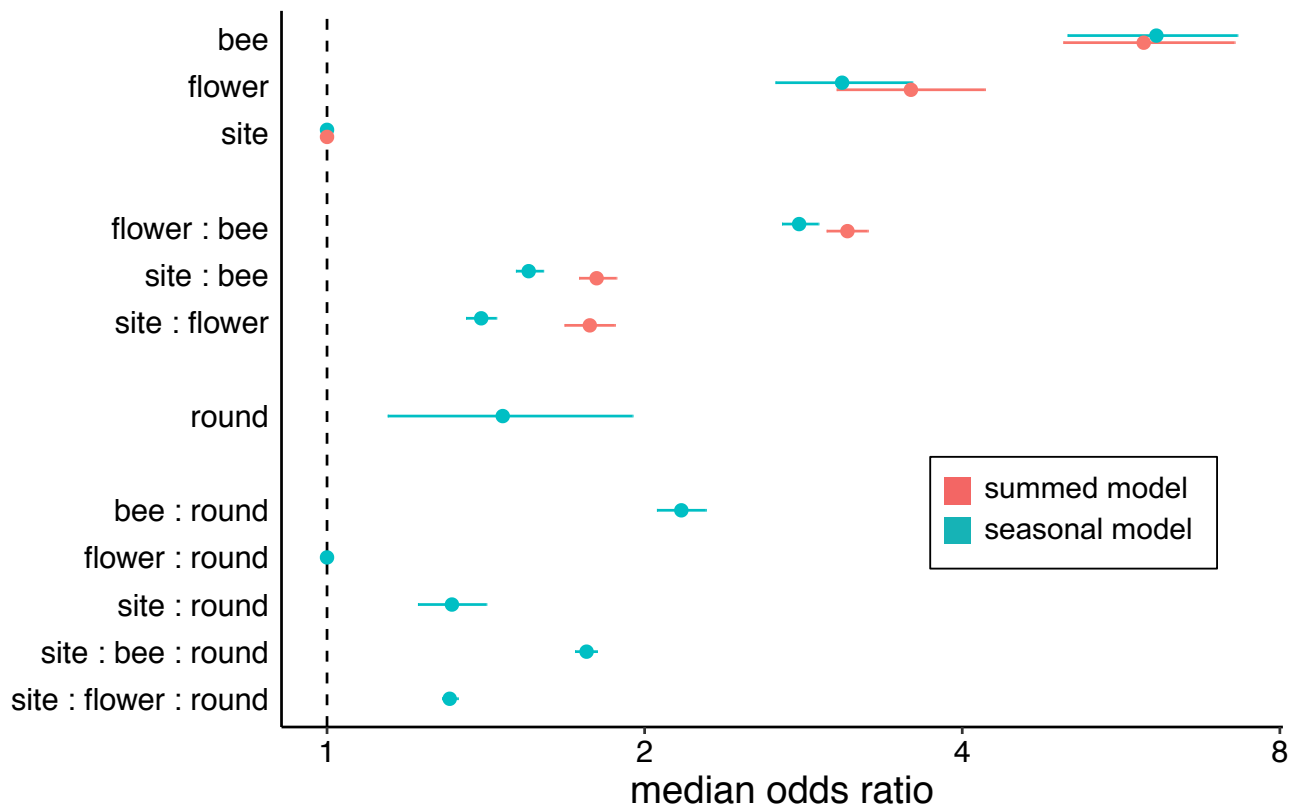

736 **Figure 4.** Flower species, along with bee species, predicts the sex of visiting  
 737 bees, which suggests floral preferences differ between male and female bees.  
 738 Flower species is an important predictor of bee sex even after accounting for  
 739 phenology (seasonal model). For each term (“bee”= bee species, “flower”=flower  
 740 species, “round”=sampling round) in each model, the median odds ratio (+/- 95%  
 741 bootstrapped credible interval) indicates the expected difference in odds that a  
 742 flower-visiting bee is male between two levels. For example, a median odds ratio  
 743 of 3.7 for the flower species term means the odds of a visitor being male are  
 744 expected to differ by a factor of 3.7 between two randomly selected species of  
 745 flower.

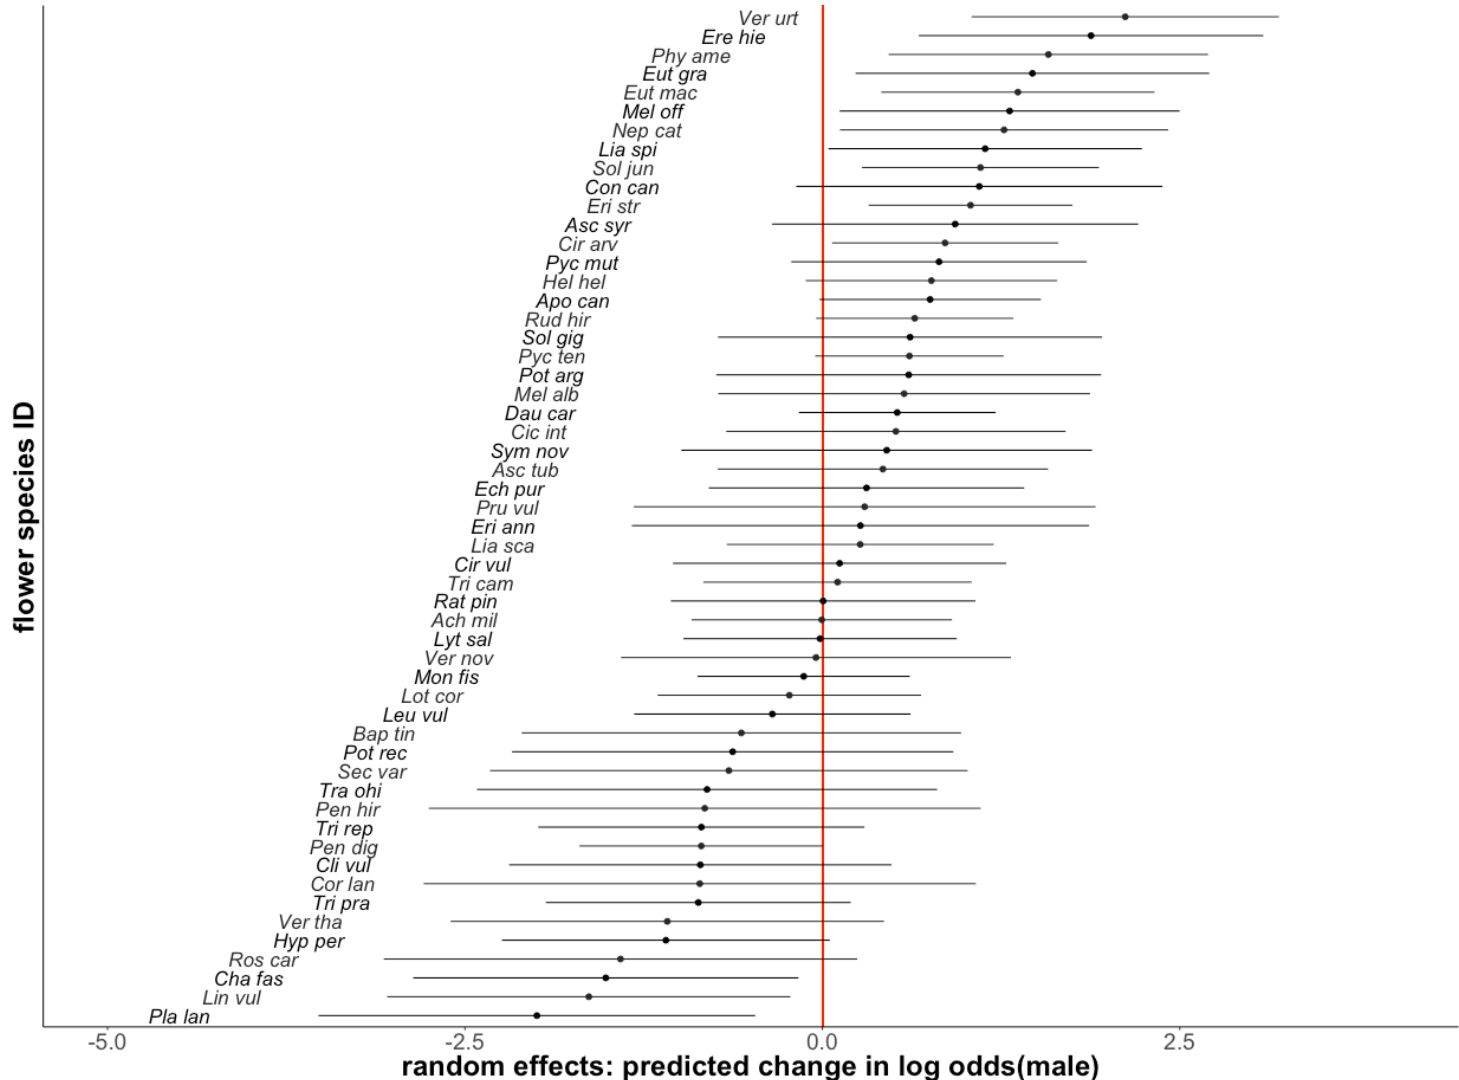

747 **Figure 5.** Male bee preferences for and against flower species vary across  
 748 flower species. Each point is the conditional mode of the random effects  
 749 prediction (the random-effects analog to an estimate), for a flower species that  
 750 received at least 20 visits, on the logit scale. Zero represents the odds of a visitor  
 751 being male on a random flower, and -2 or 2 indicates a ~7 fold decrease or  
 752 increase in those odds, given flower species identity. Error bars are the square  
 753 root of the conditional variances on the conditional mode \* 1.96, and can be  
 754 interpreted as the expected range in which the random effect for a particular  
 755 flower truly lies, analogous to 1.96 times the standard error of the mean for a  
 756 fixed effect.  
 757

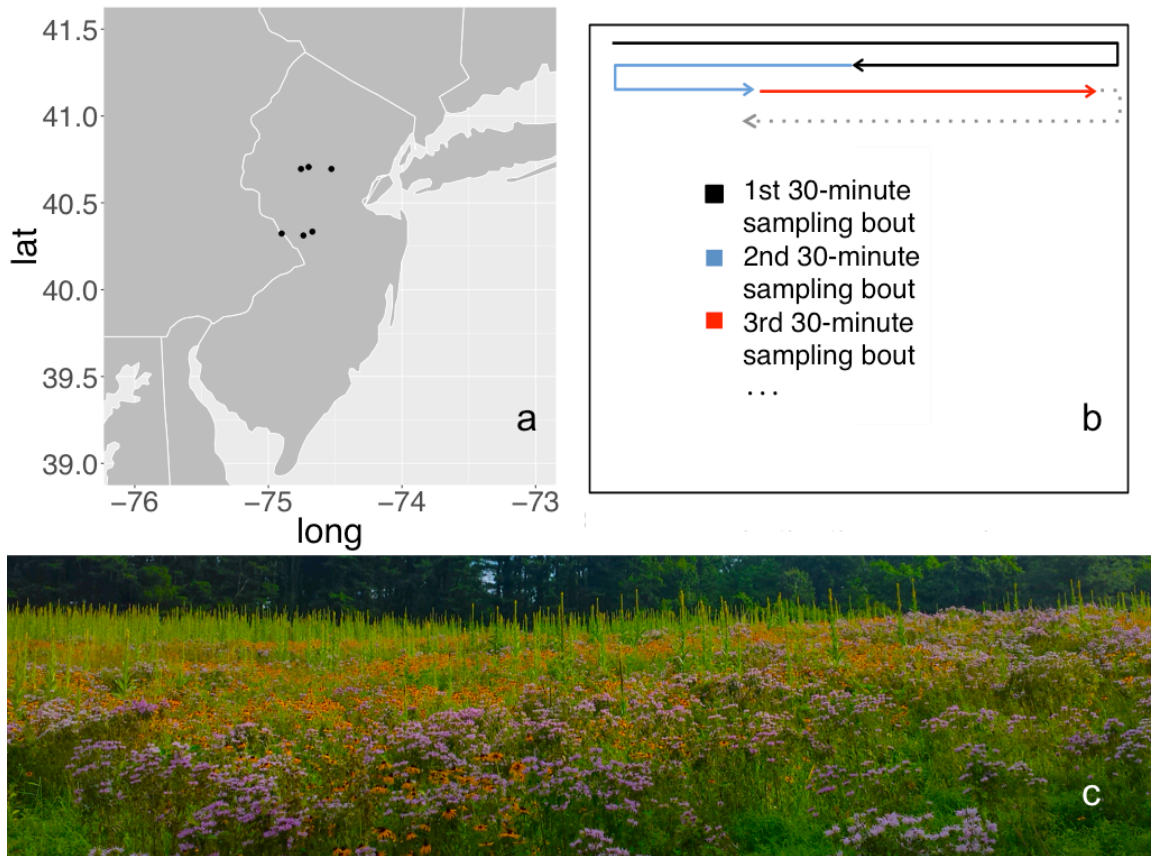

758  
759 **Figure S1:** Sampling scheme. (a) The six study sites in central New Jersey,  
760 USA. (b) Schematic sampling diagram (not to scale). One observer walked  
761 parallel 2m transects covering the entire sampling area. Each 30-minute  
762 sampling bout resumed where the previous one left off; observers typically  
763 covered the entire meadow once over a 3-day sampling round. (c) The  
764 southwestern-most site in peak bloom.

765  
766

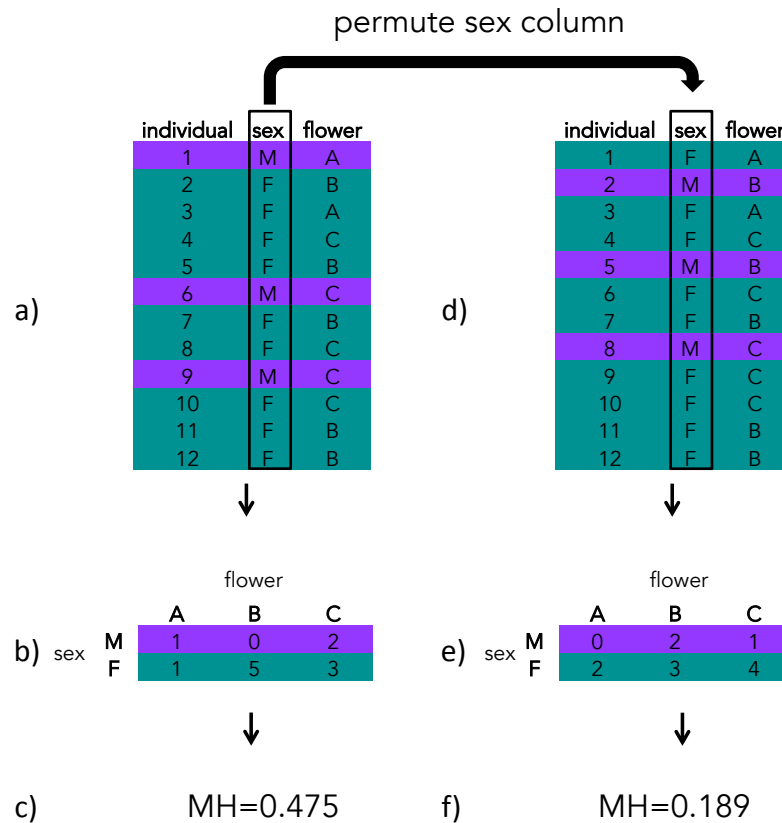

767  
768  
769  
770  
771  
772  
773  
774  
775  
776  
777  
778  
779  
780  
781  
782  
783  
784  
785

**Figure S2.** Schematic cartoon of our simulation for the dissimilarity values associated with our null hypothesis that diets of male and female bees do not differ. (a) Each collection record for each bee species associates the sex of an individual bee to the flower species from which it was collected. (b) To compute the dissimilarity between males and females, we compare all visits to each flower species from males (purple vector) to all visits to each flower species from females (green vector). (c) The Morisita-Horn index summarizes the differences between the two vectors as a value between 0 (identical) and 1 (maximally dissimilar). (d) For our null model, we shuffle the sex column from our observation table. (e) This produces two null vectors. The row and column sums for the matrices in (b) and (c) are identical, but the elements can differ. (f) For our null model, we compute the dissimilarity between the null vectors. We repeated steps d-f 9999 times to generate confidence intervals for the null hypothesis that the sex of a visiting bee is unrelated to the flower species it is collected from. When comparing the flower species visited by different species of bee, we conducted an analysis identical except that rather than comparing two sexes of the same species, we compared two species of the same sex (i.e. exchanging “sex” and “species” throughout figure S1).



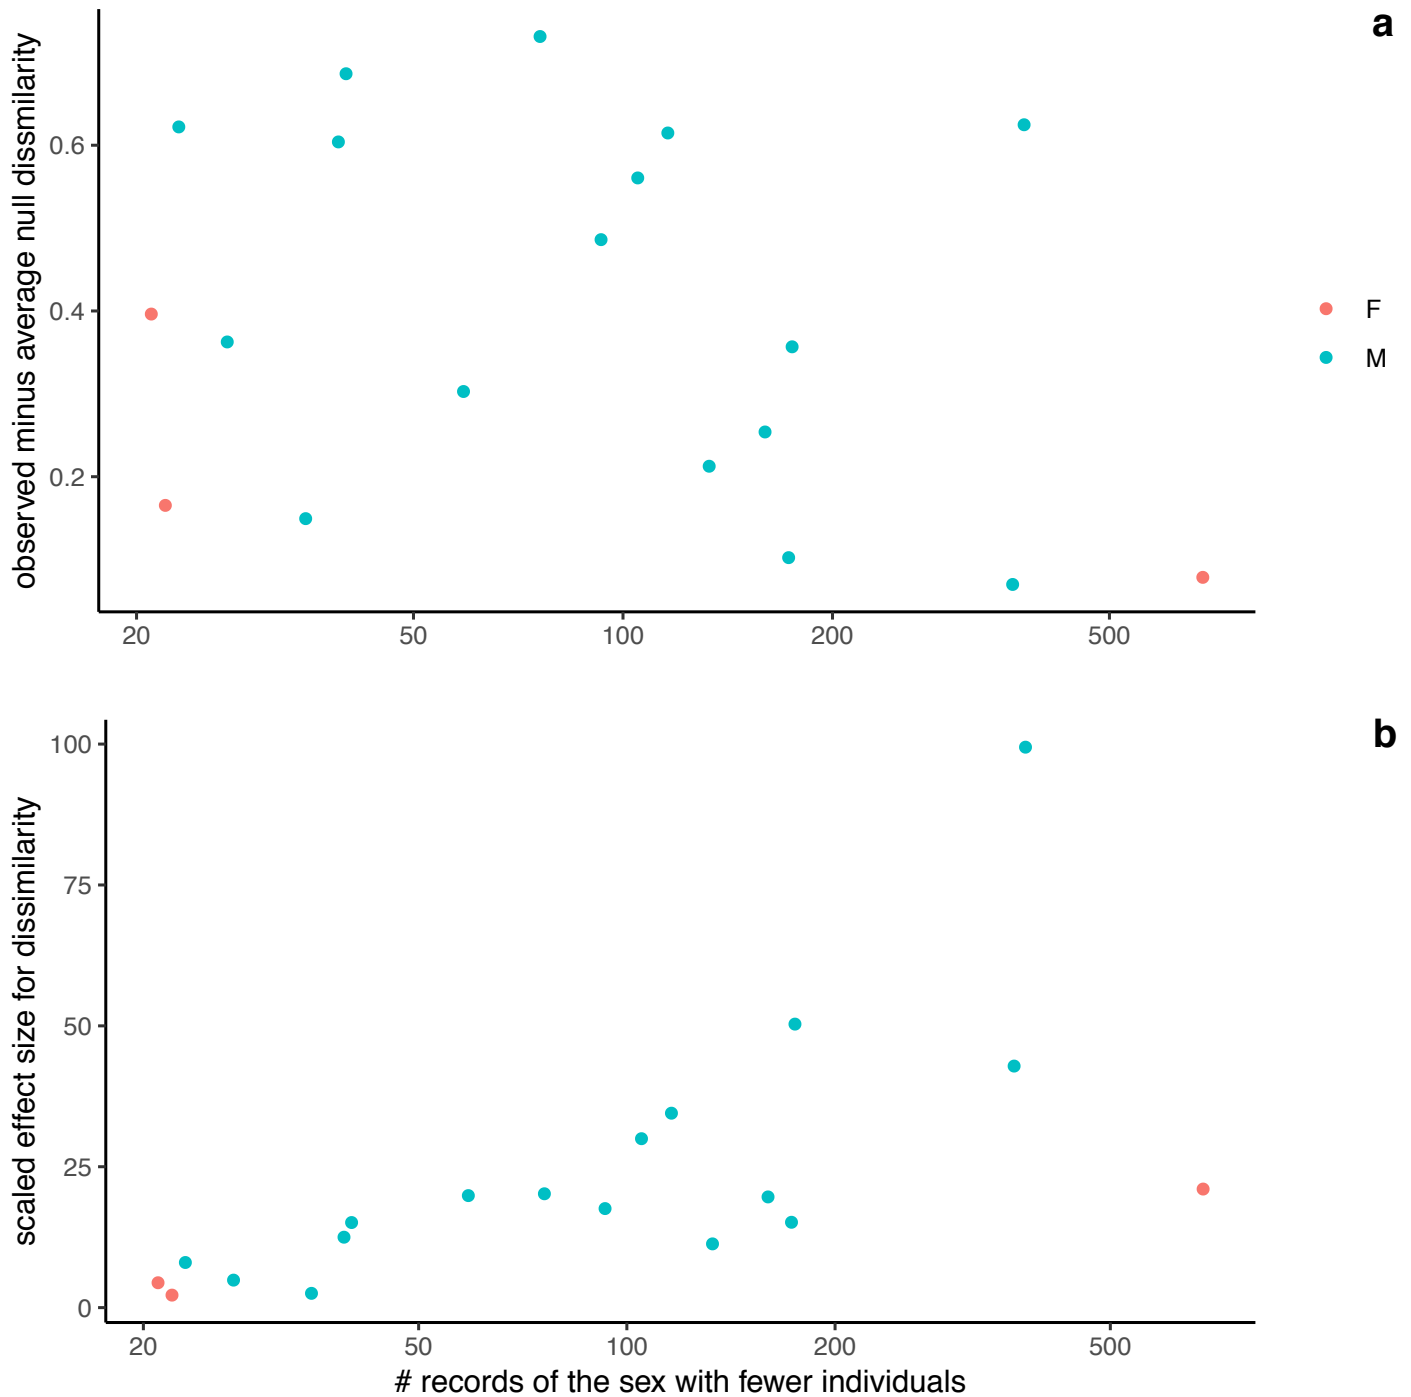

787 **Figure S3.** Effect size for diet dissimilarity is independent of sample size, while  
788 standardized effect is strongly driven by the number of individuals of the sex with  
789 the fewest records. a) Observed Morisita-Horn dissimilarity in flower communities  
790 visited by male and female bees of a single species, minus average null  
791 dissimilarity vs. the number of records for the less frequently observed sex. b)  
792 Observed minus null dissimilarity in composition of flowers visited by male and  
793 female bees of a single species, scaled by the variation in the null model, versus  
794 the number of records for the less frequently observed sex.

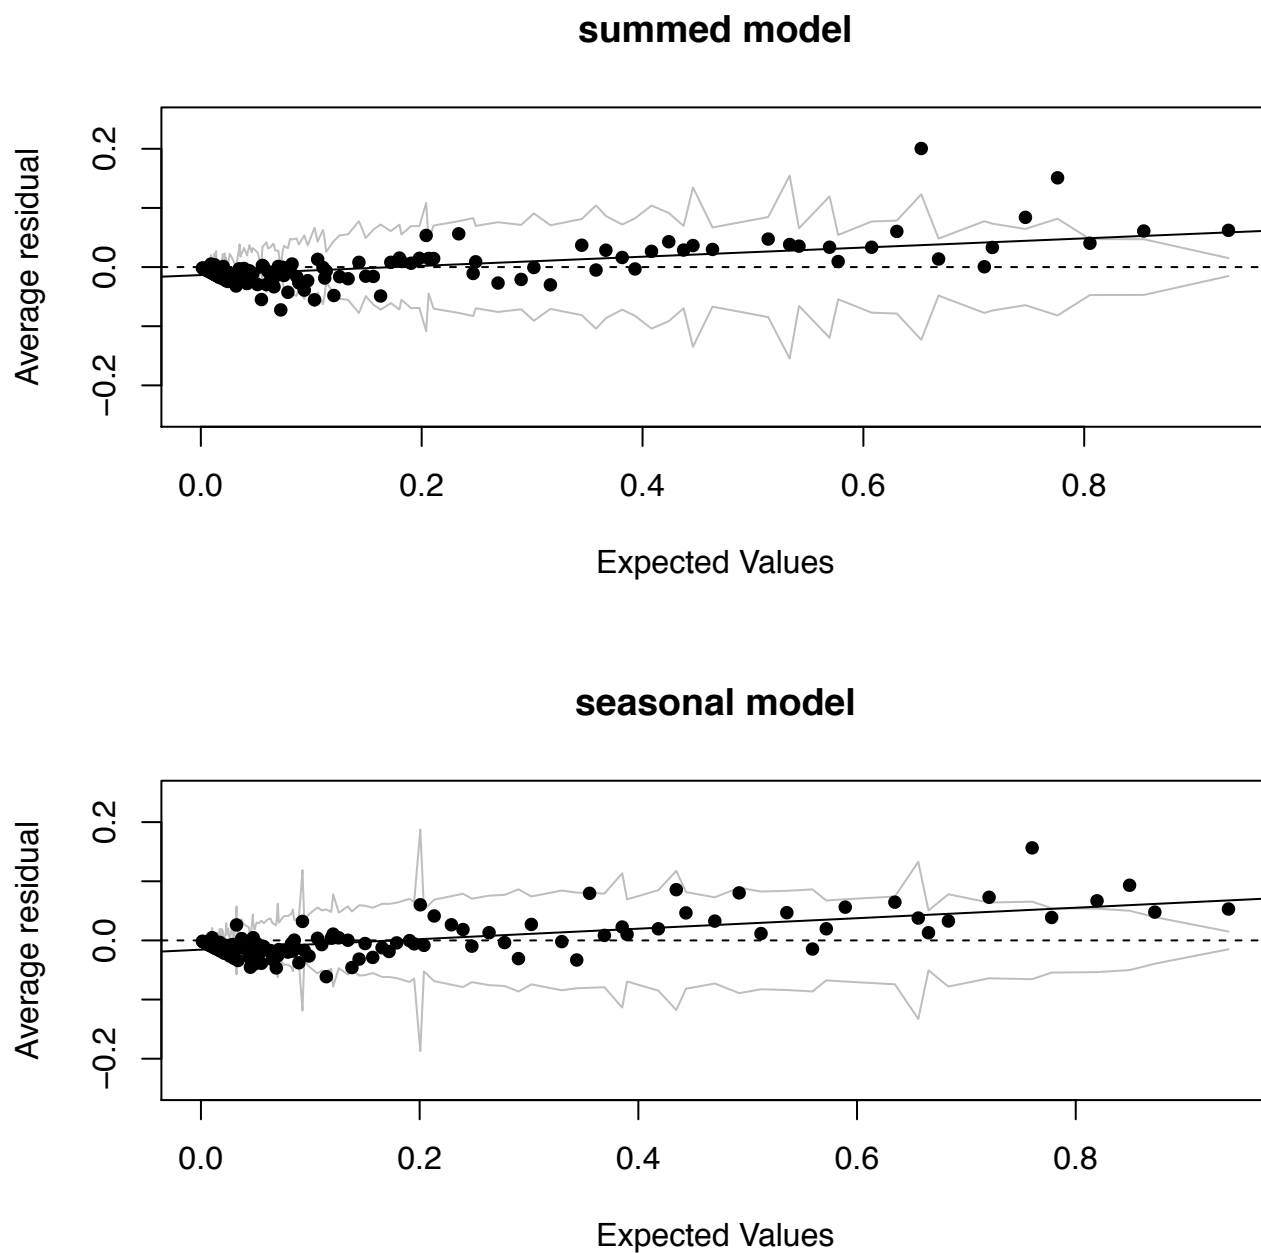

795  
796  
797

**Figure S4.** Binned residual plots for each model show minor violation of the additivity assumption. Residuals and predicted values on the probability scale.

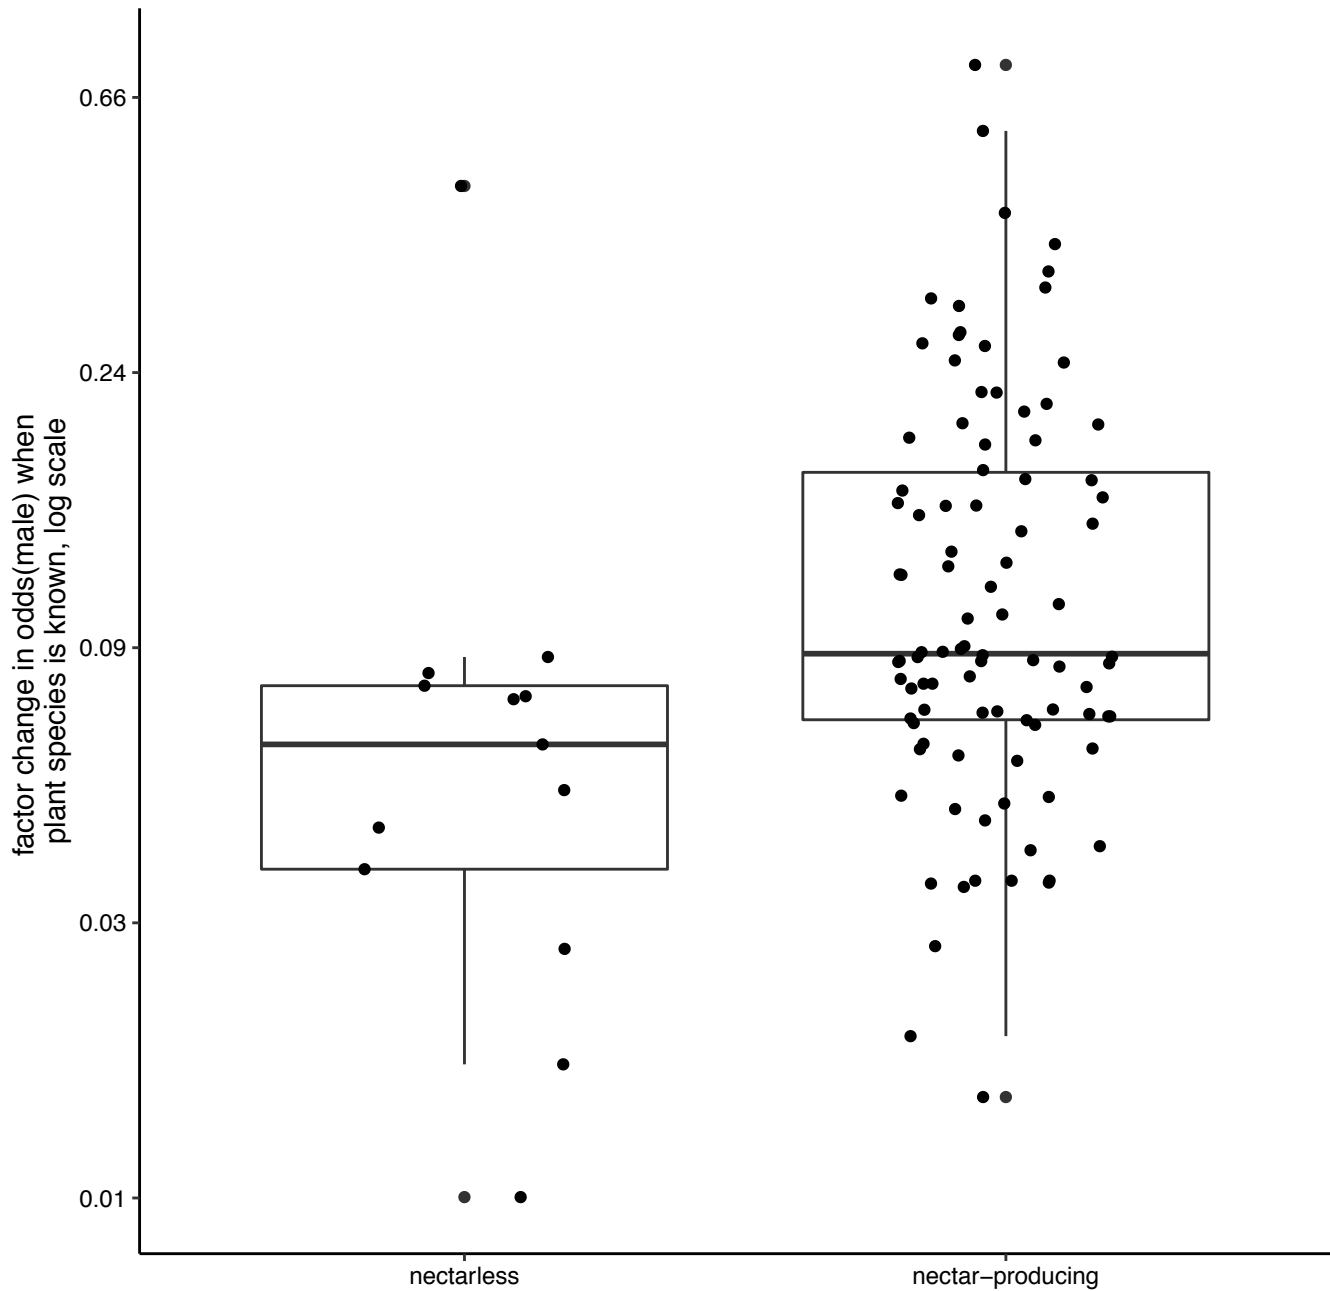

799 **Figure S5.** Seasonal model predictions are consistent with the hypothesis that  
800 male bees avoid flower species that do not produce nectar, relative to females.  
801 Each point is the random effect prediction (change in odds that a bee visiting that  
802 flower is male) for a flower species.  
803

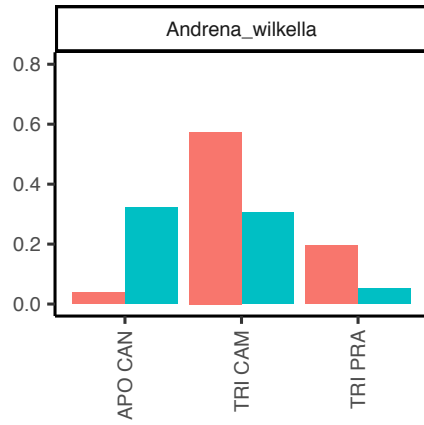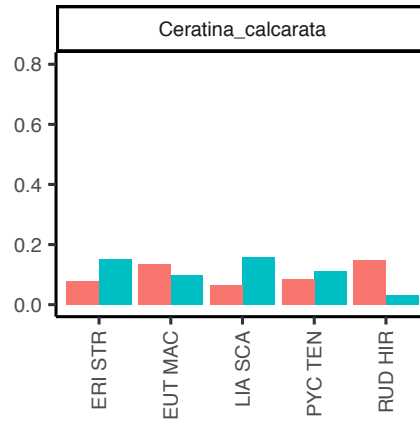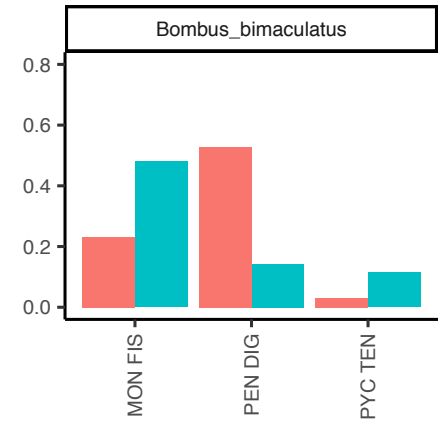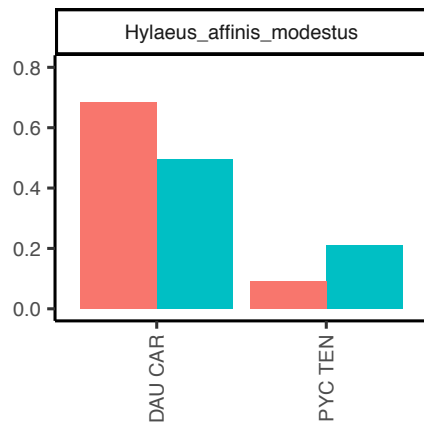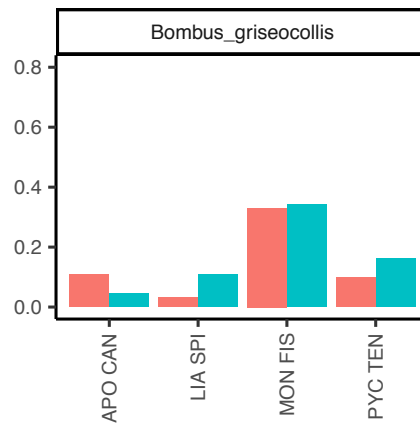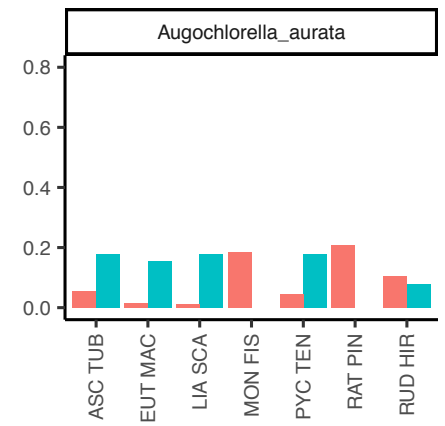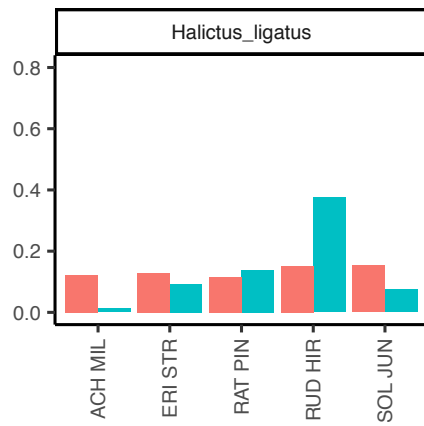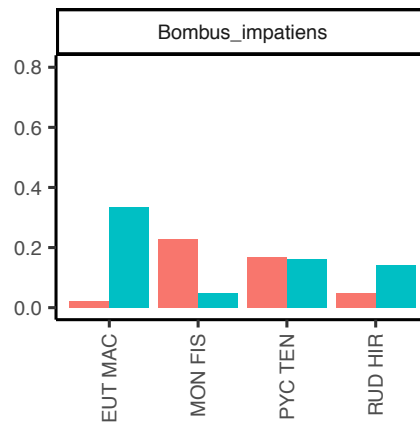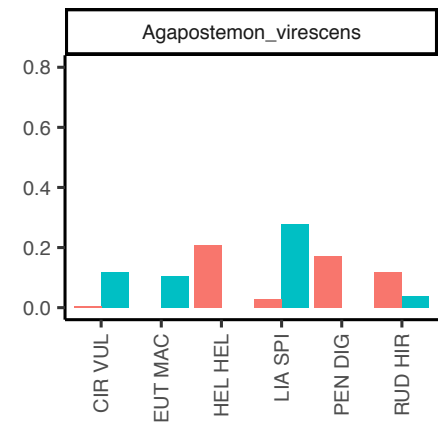

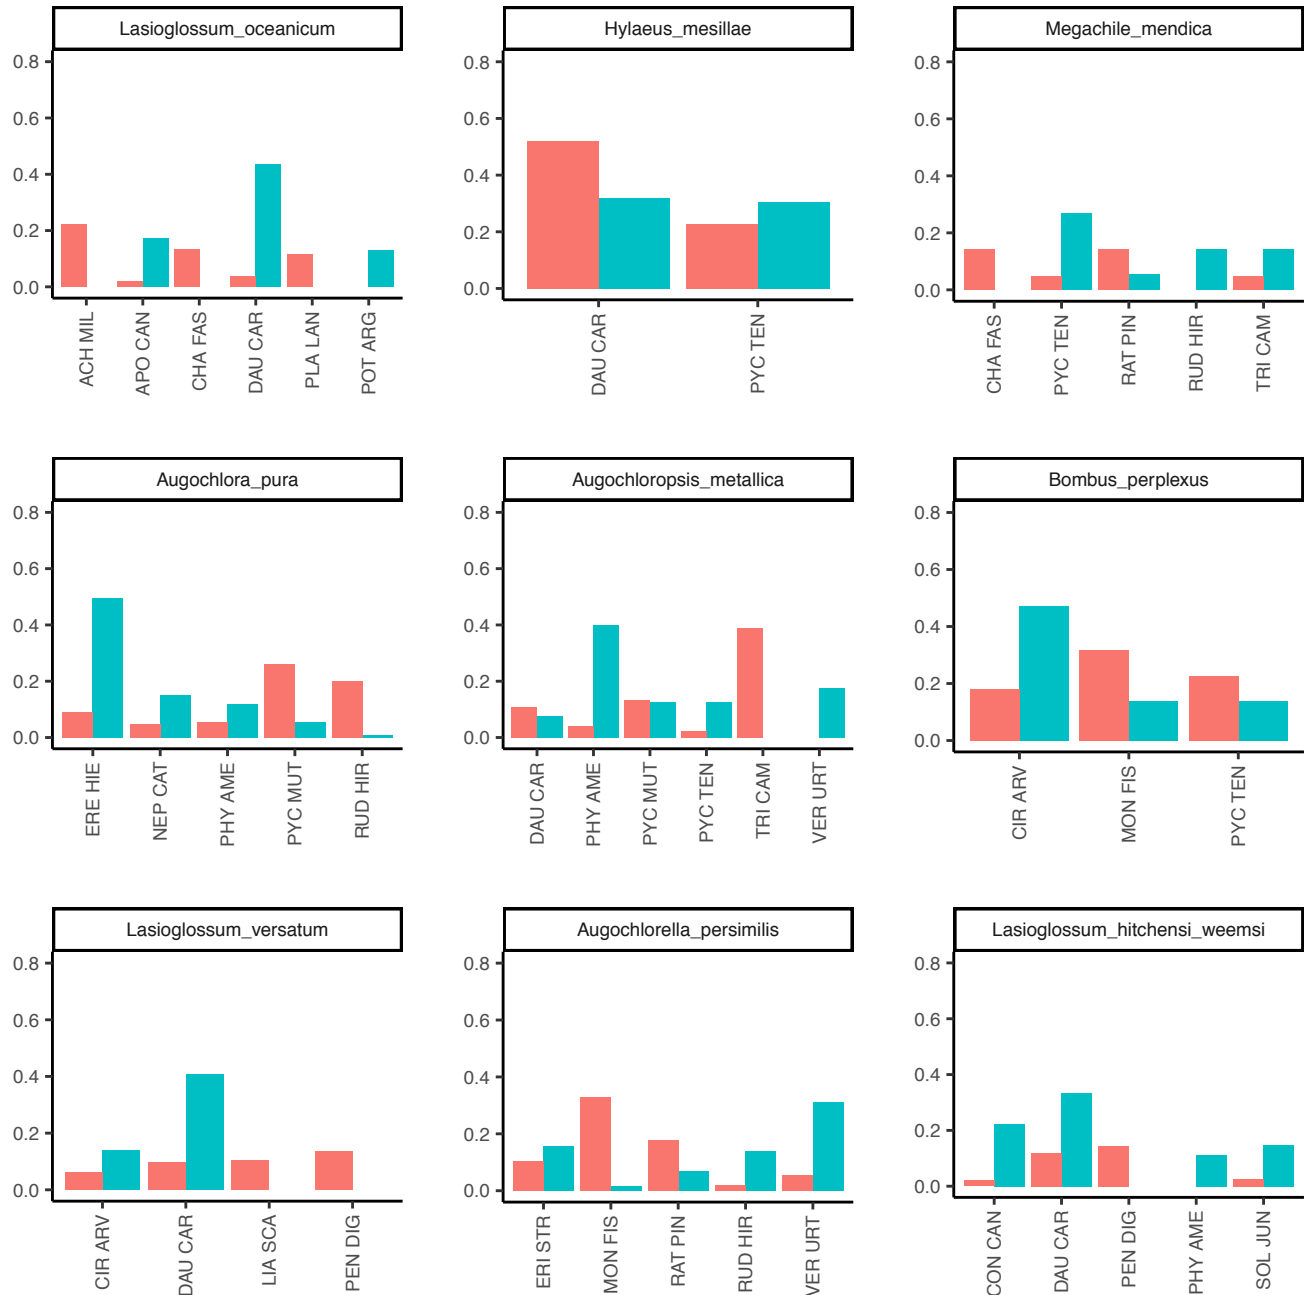

806  
807  
808  
809  
810  
811  
812

**Figure S6.** Dissimilarity in flower communities visited by male and female bees arise due to complementarity in addition to nestedness patterns. For each bee species, the proportion of male (blue) and female (red) visits to each flower species that received >10% of at least one sex's visits are pictured. Due to omitted flower species, bars may sum to <1.

813 **Table S1.** Model convergence confirmed based on similar parameter estimates across fitting routines. For each model,  
 814 the estimate for each term is given for each of 6 fitting algorithms in the R package lme4. Subsequent analyses used  
 815 parameter estimates in yellow, in both cases tied for the highest estimated likelihood with other very similar fits.

| term                               | model    | bobyqa | Nelder_Mead | nlminbw | optimx.L-BFGS-B | nloptwrap.NLOPT_LN_NELDERMEAD | nloptwrap.NLOPT_LN_BOBYQA |
|------------------------------------|----------|--------|-------------|---------|-----------------|-------------------------------|---------------------------|
| intercept                          | summed   | -2.43  | -2.43       | -2.43   | -2.43           | -2.43                         | -2.43                     |
| bee species                        | summed   | 2.04   | 2.04        | 2.04    | 2.04            | 2.04                          | 2.04                      |
| flower species                     | summed   | 1.40   | 1.40        | 1.40    | 1.40            | 1.40                          | 1.40                      |
| site                               | summed   | 0.00   | 0.00        | 0.00    | 0.00            | 0.00                          | 0.00                      |
| bee species:flower species         | summed   | 1.21   | 1.21        | 1.21    | 1.21            | 1.21                          | 1.21                      |
| site:bee species                   | summed   | 0.62   | 0.62        | 0.62    | 0.62            | 0.62                          | 0.62                      |
| site:flower species                | summed   | 0.61   | 0.61        | 0.61    | 0.61            | 0.61                          | 0.61                      |
| intercept                          | seasonal | -2.38  | -2.45       | -2.38   | -2.38           | -2.45                         | -2.45                     |
| bee species                        | seasonal | 2.09   | 2.14        | 2.09    | 2.09            | 2.13                          | 2.13                      |
| flower species                     | seasonal | 1.25   | 1.27        | 1.25    | 1.25            | 1.27                          | 1.27                      |
| site                               | seasonal | 0.00   | 0.00        | 0.00    | 0.00            | 0.00                          | 0.00                      |
| bee species:flower species         | seasonal | 1.09   | 1.10        | 1.09    | 1.09            | 1.10                          | 1.10                      |
| site:bee species                   | seasonal | 0.46   | 0.47        | 0.46    | 0.46            | 0.47                          | 0.47                      |
| site:flower species                | seasonal | 0.35   | 0.35        | 0.35    | 0.35            | 0.35                          | 0.35                      |
| sampling round                     | seasonal | 0.38   | 0.36        | 0.38    | 0.38            | 0.36                          | 0.36                      |
| sampling round:bee species         | seasonal | 0.83   | 0.84        | 0.83    | 0.83            | 0.84                          | 0.84                      |
| sampling round:flower species      | seasonal | 0.00   | 0.00        | 0.00    | 0.00            | 0.00                          | 0.00                      |
| sampling round:site                | seasonal | 0.29   | 0.29        | 0.29    | 0.29            | 0.29                          | 0.29                      |
| sampling round:site:bee species    | seasonal | 0.60   | 0.60        | 0.60    | 0.60            | 0.60                          | 0.60                      |
| sampling round:site:flower species | seasonal | 0.28   | 0.29        | 0.28    | 0.28            | 0.28                          | 0.28                      |

816

817  
818  
819  
820  
821  
822

**Table S2.** Bee species with number of female and male specimens collected.  
*This table will be removed from the final submission when data are deposited on Dryad.*

| <b>family</b> | <b>genus</b>      | <b>species</b>       | <b>females</b> | <b>males</b> |
|---------------|-------------------|----------------------|----------------|--------------|
| Andrenidae    | <i>Andrena</i>    | <i>brevipalpis</i>   | 1              | 0            |
| Andrenidae    | <i>Andrena</i>    | <i>carlini</i>       | 3              | 0            |
| Andrenidae    | <i>Andrena</i>    | <i>commoda</i>       | 3              | 0            |
| Andrenidae    | <i>Andrena</i>    | <i>cressonii</i>     | 16             | 0            |
| Andrenidae    | <i>Andrena</i>    | <i>fragilis</i>      | 2              | 0            |
| Andrenidae    | <i>Andrena</i>    | <i>hippotes</i>      | 4              | 0            |
| Andrenidae    | <i>Andrena</i>    | <i>imitatrix</i>     | 6              | 0            |
| Andrenidae    | <i>Andrena</i>    | <i>krigiana</i>      | 14             | 0            |
| Andrenidae    | <i>Andrena</i>    | <i>nasonii</i>       | 13             | 0            |
| Andrenidae    | <i>Andrena</i>    | <i>nuda</i>          | 2              | 0            |
| Andrenidae    | <i>Andrena</i>    | <i>pruni</i>         | 6              | 0            |
| Andrenidae    | <i>Andrena</i>    | <i>robertsonii</i>   | 8              | 0            |
| Andrenidae    | <i>Andrena</i>    | <i>rudbeckiae</i>    | 8              | 11           |
| Andrenidae    | <i>Andrena</i>    | <i>rugosa</i>        | 1              | 0            |
| Andrenidae    | <i>Andrena</i>    | <i>spiraeana</i>     | 1              | 0            |
| Andrenidae    | <i>Andrena</i>    | <i>vicina</i>        | 6              | 0            |
| Andrenidae    | <i>Andrena</i>    | <i>wilkella</i>      | 277            | 59           |
| Andrenidae    | <i>Andrena</i>    | <i>wilmattae</i>     | 2              | 0            |
| Andrenidae    | <i>Calliopsis</i> | <i>andreniformis</i> | 4              | 1            |
| Apidae        | <i>Anthophora</i> | <i>abrupta</i>       | 4              | 0            |
| Apidae        | <i>Anthophora</i> | <i>terminalis</i>    | 3              | 2            |
| Apidae        | <i>Bombus</i>     | <i>auricomus</i>     | 1              | 0            |
| Apidae        | <i>Bombus</i>     | <i>bimaculatus</i>   | 577            | 175          |
| Apidae        | <i>Bombus</i>     | <i>citrinus</i>      | 0              | 5            |
| Apidae        | <i>Bombus</i>     | <i>fervidus</i>      | 18             | 0            |
| Apidae        | <i>Bombus</i>     | <i>griseocollis</i>  | 681            | 815          |
| Apidae        | <i>Bombus</i>     | <i>impatiens</i>     | 2358           | 105          |
| Apidae        | <i>Bombus</i>     | <i>perplexus</i>     | 22             | 36           |
| Apidae        | <i>Bombus</i>     | <i>vagans</i>        | 14             | 2            |
| Apidae        | <i>Ceratina</i>   | <i>calcarata</i>     | 1417           | 133          |
| Apidae        | <i>Ceratina</i>   | <i>dupla</i>         | 151            | 19           |
| Apidae        | <i>Ceratina</i>   | <i>mikmaqi</i>       | 130            | 5            |
| Apidae        | <i>Ceratina</i>   | <i>strenua</i>       | 285            | 13           |

|            |                       |                         |      |     |
|------------|-----------------------|-------------------------|------|-----|
| Apidae     | <i>Melissodes</i>     | <i>agilis</i>           | 0    | 7   |
| Apidae     | <i>Melissodes</i>     | <i>bimaculatus</i>      | 9    | 1   |
| Apidae     | <i>Melissodes</i>     | <i>denticulatus</i>     | 7    | 73  |
| Apidae     | <i>Melissodes</i>     | <i>desponsus</i>        | 1    | 7   |
| Apidae     | <i>Melissodes</i>     | <i>subillatus</i>       | 31   | 6   |
| Apidae     | <i>Melissodes</i>     | <i>trinodis</i>         | 1    | 7   |
| Apidae     | <i>Nomada</i>         | <i>articulata</i>       | 4    | 0   |
| Apidae     | <i>Nomada</i>         | <i>bidentate_gr</i>     | 7    | 0   |
| Apidae     | <i>Nomada</i>         | <i>erigeronis</i>       | 1    | 0   |
| Apidae     | <i>Nomada</i>         | <i>lehighensis</i>      | 1    | 0   |
| Apidae     | <i>Nomada</i>         | <i>maculata</i>         | 2    | 0   |
| Apidae     | <i>Nomada</i>         | <i>pygmaea</i>          | 15   | 0   |
| Apidae     | <i>Ptilothrix</i>     | <i>bombiformis</i>      | 0    | 1   |
| Apidae     | <i>Triepeolus</i>     | <i>cressonii</i>        | 0    | 1   |
| Apidae     | <i>Triepeolus</i>     | <i>eliseae</i>          | 1    | 0   |
| Apidae     | <i>Triepeolus</i>     | <i>remigatus</i>        | 1    | 0   |
| Apidae     | <i>Xylocopa</i>       | <i>virginica</i>        | 137  | 13  |
| Colletidae | <i>Hylaeus</i>        | <i>affinis_modestus</i> | 1376 | 363 |
| Colletidae | <i>Hylaeus</i>        | <i>fedorica</i>         | 1    | 0   |
| Colletidae | <i>Hylaeus</i>        | <i>leptocephalus</i>    | 1    | 3   |
| Colletidae | <i>Hylaeus</i>        | <i>mesillae</i>         | 575  | 173 |
| Halictidae | <i>Agapostemon</i>    | <i>sericeus</i>         | 5    | 5   |
| Halictidae | <i>Agapostemon</i>    | <i>virescens</i>        | 203  | 76  |
| Halictidae | <i>Augochlora</i>     | <i>pura</i>             | 1036 | 377 |
| Halictidae | <i>Augochlorella</i>  | <i>aurata</i>           | 397  | 39  |
| Halictidae | <i>Augochlorella</i>  | <i>persimilis</i>       | 434  | 116 |
| Halictidae | <i>Augochloropsis</i> | <i>metallica</i>        | 121  | 40  |
| Halictidae | <i>Dufourea</i>       | <i>novaeangliae</i>     | 0    | 1   |
| Halictidae | <i>Halictus</i>       | <i>confusus</i>         | 174  | 35  |
| Halictidae | <i>Halictus</i>       | <i>ligatus</i>          | 2432 | 160 |
| Halictidae | <i>Halictus</i>       | <i>parallelus</i>       | 6    | 18  |
| Halictidae | <i>Halictus</i>       | <i>rubicundus</i>       | 31   | 19  |
| Halictidae | <i>Lasioglossum</i>   | <i>abanci</i>           | 6    | 0   |
| Halictidae | <i>Lasioglossum</i>   | <i>admirandum</i>       | 15   | 0   |
| Halictidae | <i>Lasioglossum</i>   | <i>anomalum</i>         | 17   | 0   |
| Halictidae | <i>Lasioglossum</i>   | <i>atwoodi</i>          | 7    | 1   |
| Halictidae | <i>Lasioglossum</i>   | <i>birkmanni</i>        | 1    | 0   |
| Halictidae | <i>Lasioglossum</i>   | <i>bruneri</i>          | 6    | 4   |
| Halictidae | <i>Lasioglossum</i>   | <i>callidum</i>         | 54   | 0   |



|              |                     |                         |     |    |
|--------------|---------------------|-------------------------|-----|----|
| Halictidae   | <i>Lasioglossum</i> | <i>cattellae</i>        | 14  | 4  |
| Halictidae   | <i>Lasioglossum</i> | <i>coeruleum</i>        | 2   | 0  |
| Halictidae   | <i>Lasioglossum</i> | <i>coreopsis</i>        | 1   | 0  |
| Halictidae   | <i>Lasioglossum</i> | <i>coriaceum</i>        | 14  | 0  |
| Halictidae   | <i>Lasioglossum</i> | <i>cressonii</i>        | 16  | 5  |
| Halictidae   | <i>Lasioglossum</i> | <i>ellisiae</i>         | 0   | 3  |
| Halictidae   | <i>Lasioglossum</i> | <i>ephialtum</i>        | 1   | 0  |
| Halictidae   | <i>Lasioglossum</i> | <i>foxii</i>            | 2   | 2  |
| Halictidae   | <i>Lasioglossum</i> | <i>fuscipenne</i>       | 9   | 0  |
| Halictidae   | <i>Lasioglossum</i> | <i>gotham</i>           | 74  | 2  |
| Halictidae   | <i>Lasioglossum</i> | <i>hitchensi_weemsi</i> | 152 | 27 |
| Halictidae   | <i>Lasioglossum</i> | <i>illinoense</i>       | 70  | 7  |
| Halictidae   | <i>Lasioglossum</i> | <i>imitatum</i>         | 462 | 15 |
| Halictidae   | <i>Lasioglossum</i> | <i>leucocomum</i>       | 2   | 0  |
| Halictidae   | <i>Lasioglossum</i> | <i>leucozonium</i>      | 2   | 0  |
| Halictidae   | <i>Lasioglossum</i> | <i>nigroviride</i>      | 2   | 0  |
| Halictidae   | <i>Lasioglossum</i> | <i>oblongum</i>         | 4   | 2  |
| Halictidae   | <i>Lasioglossum</i> | <i>obscurum</i>         | 7   | 1  |
| Halictidae   | <i>Lasioglossum</i> | <i>oceanicum</i>        | 104 | 23 |
| Halictidae   | <i>Lasioglossum</i> | <i>oenotherae</i>       | 1   | 0  |
| Halictidae   | <i>Lasioglossum</i> | <i>paradmiraandum</i>   | 50  | 0  |
| Halictidae   | <i>Lasioglossum</i> | <i>pectorale</i>        | 3   | 0  |
| Halictidae   | <i>Lasioglossum</i> | <i>pilosum</i>          | 2   | 0  |
| Halictidae   | <i>Lasioglossum</i> | <i>platyparium</i>      | 2   | 3  |
| Halictidae   | <i>Lasioglossum</i> | <i>rozeni</i>           | 15  | 11 |
| Halictidae   | <i>Lasioglossum</i> | <i>smilacinae</i>       | 4   | 0  |
| Halictidae   | <i>Lasioglossum</i> | <i>subviridatum</i>     | 5   | 1  |
| Halictidae   | <i>Lasioglossum</i> | <i>tegulare</i>         | 31  | 2  |
| Halictidae   | <i>Lasioglossum</i> | <i>trigeminum</i>       | 44  | 0  |
| Halictidae   | <i>Lasioglossum</i> | <i>truncatum</i>        | 2   | 0  |
| Halictidae   | <i>Lasioglossum</i> | <i>versatum</i>         | 681 | 93 |
| Halictidae   | <i>Lasioglossum</i> | <i>viridatum</i>        | 11  | 2  |
| Halictidae   | <i>Lasioglossum</i> | <i>zephyrum</i>         | 12  | 1  |
| Halictidae   | <i>Sphecodes</i>    | <i>atlantis</i>         | 0   | 1  |
| Halictidae   | <i>Sphecodes</i>    | <i>dichrous</i>         | 3   | 5  |
| Halictidae   | <i>Sphecodes</i>    | <i>heraclei</i>         | 10  | 5  |
| Megachilidae | <i>Anthidiellum</i> | <i>notatum</i>          | 4   | 1  |
| Megachilidae | <i>Anthidium</i>    | <i>manicatum</i>        | 7   | 8  |
| Megachilidae | <i>Anthidium</i>    | <i>oblongatum</i>       | 18  | 19 |

|              |                        |                      |    |    |
|--------------|------------------------|----------------------|----|----|
| Megachilidae | <i>Coelioxys</i>       | <i>alternatus</i>    | 1  | 2  |
| Megachilidae | <i>Coelioxys</i>       | <i>banksi</i>        | 1  | 0  |
| Megachilidae | <i>Coelioxys</i>       | <i>germanus</i>      | 0  | 1  |
| Megachilidae | <i>Coelioxys</i>       | <i>hunteri</i>       | 0  | 1  |
| Megachilidae | <i>Coelioxys</i>       | <i>modestus</i>      | 0  | 1  |
| Megachilidae | <i>Coelioxys</i>       | <i>obtusiventris</i> | 1  | 0  |
| Megachilidae | <i>Coelioxys</i>       | <i>octodentatus</i>  | 1  | 1  |
| Megachilidae | <i>Coelioxys</i>       | <i>porterae</i>      | 0  | 1  |
| Megachilidae | <i>Coelioxys</i>       | <i>sayi</i>          | 2  | 6  |
| Megachilidae | <i>Heriades</i>        | <i>carinatus</i>     | 31 | 2  |
| Megachilidae | <i>Heriades</i>        | <i>leavitti</i>      | 1  | 6  |
| Megachilidae | <i>Heriades</i>        | <i>variolosus</i>    | 10 | 0  |
| Megachilidae | <i>Hoplitis</i>        | <i>pilosifrons</i>   | 46 | 1  |
| Megachilidae | <i>Hoplitis</i>        | <i>producta</i>      | 8  | 0  |
| Megachilidae | <i>Hoplitis</i>        | <i>spoliata</i>      | 2  | 1  |
| Megachilidae | <i>Lithurgus</i>       | <i>chrysurus</i>     | 0  | 6  |
| Megachilidae | <i>Megachile</i>       | <i>brevis</i>        | 25 | 3  |
| Megachilidae | <i>Megachile</i>       | <i>campanulae</i>    | 6  | 18 |
| Megachilidae | <i>Megachile</i>       | <i>exilis</i>        | 11 | 29 |
| Megachilidae | <i>Megachile</i>       | <i>frugalis</i>      | 26 | 6  |
| Megachilidae | <i>Megachile</i>       | <i>gemula</i>        | 4  | 2  |
| Megachilidae | <i>Megachile</i>       | <i>georgica</i>      | 1  | 0  |
| Megachilidae | <i>Megachile</i>       | <i>inimica</i>       | 4  | 0  |
| Megachilidae | <i>Megachile</i>       | <i>integra</i>       | 1  | 0  |
| Megachilidae | <i>Megachile</i>       | <i>melanophaea</i>   | 0  | 1  |
| Megachilidae | <i>Megachile</i>       | <i>mendica</i>       | 21 | 56 |
| Megachilidae | <i>Megachile</i>       | <i>montivaga</i>     | 15 | 9  |
| Megachilidae | <i>Megachile</i>       | <i>petulans</i>      | 0  | 2  |
| Megachilidae | <i>Megachile</i>       | <i>pugnata</i>       | 2  | 3  |
| Megachilidae | <i>Megachile</i>       | <i>rotundata</i>     | 11 | 8  |
| Megachilidae | <i>Megachile</i>       | <i>sculpturalis</i>  | 17 | 32 |
| Megachilidae | <i>Megachile</i>       | <i>xylocopoides</i>  | 2  | 1  |
| Megachilidae | <i>Osmia</i>           | <i>albiventris</i>   | 3  | 0  |
| Megachilidae | <i>Osmia</i>           | <i>atriventris</i>   | 9  | 0  |
| Megachilidae | <i>Osmia</i>           | <i>bucephala</i>     | 21 | 0  |
| Megachilidae | <i>Osmia</i>           | <i>distincta</i>     | 7  | 0  |
| Megachilidae | <i>Osmia</i>           | <i>georgica</i>      | 5  | 0  |
| Megachilidae | <i>Osmia</i>           | <i>pumila</i>        | 30 | 0  |
| Megachilidae | <i>Pseudoanthidium</i> | <i>nanum</i>         | 0  | 1  |

|              |               |                  |   |   |
|--------------|---------------|------------------|---|---|
| Megachilidae | <i>Stelis</i> | <i>lateralis</i> | 1 | 0 |
| Megachilidae | <i>Stelis</i> | <i>louisae</i>   | 1 | 2 |

823

824

825

826

827

828

829

**Table S3.** Number of male and female visitors to each plant species, and bias towards attracting male bee visitors. This bias is the random effect prediction from the seasonal model, which indicates the change in log(odds) that a visiting bee is male when the species of flower it visits is given; greater values indicate male bias.

| family        | genus               | species               | female visits | male visits | random effect |
|---------------|---------------------|-----------------------|---------------|-------------|---------------|
| Alliaceae     | <i>Allium</i>       | <i>vineale</i>        | 3             | 0           | -0.224        |
| Apiaceae      | <i>Daucus</i>       | <i>carota</i>         | 1778          | 350         | 0.526         |
| Apiaceae      | <i>Eryngium</i>     | <i>yuccifolium</i>    | 2             | 0           | -0.225        |
| Apiaceae      | <i>Sanicula</i>     | <i>canadensis</i>     | 1             | 0           | -0.049        |
| Apocynaceae   | <i>Apocynum</i>     | <i>cannabinum</i>     | 283           | 92          | 0.754         |
| Asclepidaceae | <i>Asclepias</i>    | <i>incarnata</i>      | 7             | 0           | -0.736        |
| Asclepidaceae | <i>Asclepias</i>    | <i>syriaca</i>        | 28            | 89          | 0.929         |
| Asclepidaceae | <i>Asclepias</i>    | <i>tuberosa</i>       | 114           | 26          | 0.423         |
| Asteraceae    | <i>Achillea</i>     | <i>millefolium</i>    | 472           | 36          | -0.004        |
| Asteraceae    | <i>Bidens</i>       | <i>trichosperma</i>   | 1             | 0           | -0.015        |
| Asteraceae    | <i>Carduus</i>      | <i>nutans</i>         | 1             | 0           | -0.366        |
| Asteraceae    | <i>Centuarea</i>    | <i>stoebe</i>         | 321           | 50          | 0.265         |
| Asteraceae    | <i>Cichorium</i>    | <i>intybus</i>        | 104           | 10          | 0.516         |
| Asteraceae    | <i>Cirsium</i>      | <i>arvense</i>        | 351           | 96          | 0.858         |
| Asteraceae    | <i>Cirsium</i>      | <i>discolor</i>       | 5             | 2           | 0.349         |
| Asteraceae    | <i>Cirsium</i>      | <i>vulgare</i>        | 112           | 16          | 0.121         |
| Asteraceae    | <i>Conyza</i>       | <i>canadensis</i>     | 32            | 10          | 1.097         |
| Asteraceae    | <i>Coreopsis</i>    | <i>lanceolata</i>     | 21            | 0           | -0.857        |
| Asteraceae    | <i>Coreopsis</i>    | <i>tinctoria</i>      | 1             | 0           | -0.069        |
| Asteraceae    | <i>Crepis</i>       | <i>capillaris</i>     | 6             | 0           | -0.236        |
| Asteraceae    | <i>Doellingeria</i> | <i>umbellata</i>      | 1             | 0           | -0.052        |
| Asteraceae    | <i>Echinacea</i>    | <i>purpurea</i>       | 86            | 45          | 0.309         |
| Asteraceae    | <i>Erechtites</i>   | <i>hieraciifolius</i> | 130           | 203         | 1.878         |
| Asteraceae    | <i>Erigeron</i>     | <i>annuus</i>         | 26            | 3           | 0.266         |
| Asteraceae    | <i>Erigeron</i>     | <i>strigosus</i>      | 712           | 119         | 1.037         |
| Asteraceae    | <i>Euthamia</i>     | <i>graminifolia</i>   | 50            | 18          | 1.467         |
| Asteraceae    | <i>Eutrochium</i>   | <i>maculatum</i>      | 461           | 166         | 1.368         |
| Asteraceae    | <i>Gaillardia</i>   | <i>aristata</i>       | 4             | 0           | -0.274        |
| Asteraceae    | <i>Helianthus</i>   | <i>angustifolius</i>  | 11            | 0           | -0.411        |

|                 |                      |                       |      |     |        |
|-----------------|----------------------|-----------------------|------|-----|--------|
| Asteraceae      | <i>Helianthus</i>    | <i>strumosus</i>      | 1    | 1   | 0.517  |
| Asteraceae      | <i>Heliopsis</i>     | <i>helianthoides</i>  | 186  | 49  | 0.763  |
| Asteraceae      | <i>Hieracium</i>     | <i>pilosella</i>      | 2    | 0   | -0.148 |
| Asteraceae      | <i>Krigia</i>        | <i>biflora</i>        | 19   | 0   | -0.542 |
| Asteraceae      | <i>Lactuca</i>       | <i>serriola</i>       | 4    | 0   | -0.257 |
| Asteraceae      | <i>Leucanthemum</i>  | <i>vulgare</i>        | 405  | 20  | -0.349 |
| Asteraceae      | <i>Liatris</i>       | <i>spicata</i>        | 186  | 127 | 1.137  |
| Asteraceae      | <i>Ratibida</i>      | <i>pinnata</i>        | 539  | 121 | 0.005  |
| Asteraceae      | <i>Rudbeckia</i>     | <i>hirta</i>          | 1174 | 189 | 0.645  |
| Asteraceae      | <i>Solidago</i>      | <i>altissima</i>      | 8    | 0   | -0.586 |
| Asteraceae      | <i>Solidago</i>      | <i>canadensis</i>     | 8    | 2   | 0.816  |
| Asteraceae      | <i>Solidago</i>      | <i>gigantea</i>       | 107  | 9   | 0.613  |
| Asteraceae      | <i>Solidago</i>      | <i>juncea</i>         | 636  | 77  | 1.106  |
| Asteraceae      | <i>Solidago</i>      | <i>rugosa</i>         | 1    | 0   | -0.015 |
| Asteraceae      | <i>Symphotrichum</i> | <i>novae-angliae</i>  | 25   | 6   | 0.451  |
| Asteraceae      | <i>Vernonia</i>      | <i>noveboracensis</i> | 52   | 37  | -0.045 |
| Brassicaceae    | <i>Barbarea</i>      | <i>vulgaris</i>       | 3    | 0   | -0.114 |
| Campanulaceae   | <i>Lobelia</i>       | <i>inflata</i>        | 12   | 3   | 1.147  |
| Campanulaceae   | <i>Lobelia</i>       | <i>siphilitica</i>    | 2    | 0   | -0.034 |
| Caryophyllaceae | <i>Dianthus</i>      | <i>armeria</i>        | 3    | 0   | -0.280 |
| Commelinaceae   | <i>Tradescantia</i>  | <i>ohiensis</i>       | 34   | 1   | -0.805 |
| Convolvulaceae  | <i>Calystegia</i>    | <i>silvatica</i>      | 5    | 0   | -0.538 |
| Cornaceae       | <i>Swida</i>         | <i>amomum</i>         | 4    | 0   | -0.250 |
| Cornaceae       | <i>Swida</i>         | <i>racemosa</i>       | 12   | 1   | 0.546  |
| Fabaceae        | <i>Baptisia</i>      | <i>tinctoria</i>      | 19   | 5   | -0.566 |
| Fabaceae        | <i>Chamaecrista</i>  | <i>fasciculata</i>    | 246  | 2   | -1.514 |
| Fabaceae        | <i>Desmodium</i>     | <i>paniculatum</i>    | 6    | 1   | -0.138 |
| Fabaceae        | <i>Lotus</i>         | <i>corniculatus</i>   | 142  | 33  | -0.231 |
| Fabaceae        | <i>Melilotus</i>     | <i>albus</i>          | 20   | 9   | 0.571  |
| Fabaceae        | <i>Melilotus</i>     | <i>officinalis</i>    | 41   | 21  | 1.309  |
| Fabaceae        | <i>Securigera</i>    | <i>varia</i>          | 38   | 1   | -0.654 |
| Fabaceae        | <i>Senna</i>         | <i>hebecarpa</i>      | 5    | 5   | 1.678  |
| Fabaceae        | <i>Trifolium</i>     | <i>aureum</i>         | 1    | 0   | -0.033 |
| Fabaceae        | <i>Trifolium</i>     | <i>campestre</i>      | 365  | 39  | 0.106  |
| Fabaceae        | <i>Trifolium</i>     | <i>hybridum</i>       | 11   | 7   | 0.739  |
| Fabaceae        | <i>Trifolium</i>     | <i>pratense</i>       | 192  | 20  | -0.869 |
| Fabaceae        | <i>Trifolium</i>     | <i>repens</i>         | 130  | 6   | -0.847 |
| Fabaceae        | <i>Vicia</i>         | <i>tetrasperma</i>    | 1    | 0   | -0.048 |
| Gentianaceae    | <i>Sabatia</i>       | <i>angularis</i>      | 1    | 0   | -0.034 |

|                  |                     |                      |      |     |        |
|------------------|---------------------|----------------------|------|-----|--------|
| Hypericaceae     | <i>Hypericum</i>    | <i>perforatum</i>    | 223  | 10  | -1.095 |
| Hypericaceae     | <i>Hypericum</i>    | <i>punctatum</i>     | 1    | 0   | -0.176 |
| Iridaceae        | <i>Sisyrinchium</i> | <i>angustifolium</i> | 9    | 0   | -0.351 |
| Lamiaceae        | <i>Clinopodium</i>  | <i>vulgare</i>       | 64   | 3   | -0.854 |
| Lamiaceae        | <i>Monarda</i>      | <i>fistulosa</i>     | 1397 | 400 | -0.131 |
| Lamiaceae        | <i>Monarda</i>      | <i>punctata</i>      | 0    | 1   | 1.242  |
| Lamiaceae        | <i>Nepeta</i>       | <i>cataria</i>       | 99   | 81  | 1.270  |
| Lamiaceae        | <i>Prunella</i>     | <i>vulgaris</i>      | 17   | 5   | 0.296  |
| Lamiaceae        | <i>Pycnanthemum</i> | <i>muticum</i>       | 398  | 59  | 0.811  |
| Lamiaceae        | <i>Pycnanthemum</i> | <i>tenuifolium</i>   | 1113 | 421 | 0.609  |
| Lamiaceae        | <i>Pycnanthemum</i> | <i>verticillatum</i> | 5    | 8   | 0.886  |
| Lamiaceae        | <i>Teucrium</i>     | <i>canadense</i>     | 3    | 0   | -0.104 |
| Loniceraceae     | <i>Lonicera</i>     | <i>japonica</i>      | 1    | 0   | -0.131 |
| Lythraceae       | <i>Lythrum</i>      | <i>salicaria</i>     | 364  | 38  | -0.016 |
| Onagraceae       | <i>Oenothera</i>    | <i>biennis</i>       | 2    | 0   | -0.143 |
| Onagraceae       | <i>Oenothera</i>    | <i>fruticosa</i>     | 2    | 1   | 0.221  |
| Oxalidaceae      | <i>Oxalis</i>       | <i>stricta</i>       | 8    | 0   | -0.249 |
| Phytolaccaceae   | <i>Phytolacca</i>   | <i>americana</i>     | 108  | 74  | 1.580  |
| Plantaginaceae   | <i>Plantago</i>     | <i>lanceolata</i>    | 147  | 0   | -1.997 |
| Poaceae          | <i>Glyceria</i>     | <i>grandis</i>       | 1    | 0   | -0.187 |
| Poaceae          | <i>Sorghastrum</i>  | <i>nutans</i>        | 1    | 0   | -0.092 |
| Polygonaceae     | <i>Fallopia</i>     | <i>convolvulus</i>   | 3    | 4   | 1.044  |
| Polygonaceae     | <i>Persicaria</i>   | <i>pensylvanica</i>  | 4    | 0   | -0.391 |
| Polygonaceae     | <i>Persicaria</i>   | <i>setacea</i>       | 3    | 1   | 0.158  |
| Ranunculaceae    | <i>Ranunculus</i>   | <i>hispidus</i>      | 1    | 0   | -0.057 |
| Rosaceae         | <i>Drymocallis</i>  | <i>arguta</i>        | 22   | 8   | 0.604  |
| Rosaceae         | <i>Potentilla</i>   | <i>recta</i>         | 56   | 1   | -0.628 |
| Rosaceae         | <i>Rosa</i>         | <i>carolina</i>      | 71   | 1   | -1.412 |
| Rosaceae         | <i>Rosa</i>         | <i>multiflora</i>    | 5    | 0   | -0.264 |
| Rosaceae         | <i>Rubus</i>        | <i>flagellaris</i>   | 1    | 0   | -0.027 |
| Rosaceae         | <i>Rubus</i>        | <i>pensilvanicus</i> | 7    | 0   | -0.241 |
| Rubiaceae        | <i>Galium</i>       | <i>mollugo</i>       | 4    | 0   | -0.369 |
| Scrophulariaceae | <i>Linaria</i>      | <i>vulgaris</i>      | 275  | 4   | -1.633 |
| Scrophulariaceae | <i>Penstemon</i>    | <i>digitalis</i>     | 862  | 48  | -0.847 |
| Scrophulariaceae | <i>Penstemon</i>    | <i>hirsutus</i>      | 36   | 0   | -0.822 |
| Scrophulariaceae | <i>Verbascum</i>    | <i>blattaria</i>     | 15   | 0   | -0.721 |
| Scrophulariaceae | <i>Verbascum</i>    | <i>thapsus</i>       | 129  | 1   | -1.085 |
| Solanaceae       | <i>Solanum</i>      | <i>carolinense</i>   | 14   | 0   | -0.518 |
| Verbenaceae      | <i>Verbena</i>      | <i>hastata</i>       | 8    | 3   | 0.927  |

|             |                |                    |    |    |       |
|-------------|----------------|--------------------|----|----|-------|
| Verbenaceae | <i>Verbena</i> | <i>simplex</i>     | 11 | 3  | 0.482 |
| Verbenaceae | <i>Verbena</i> | <i>urticifolia</i> | 58 | 71 | 2.118 |

830
